# Supplementary material for: Multilevel Risk Analysis of Clinical Mastitis in Dairy Cows in Plateau State, Nigeria: A Hierarchical Mixed-Effects Logistic Regression Modelling Approach
Source: Research Square preprint supplement (doi:10.21203/rs.3.rs-7142653/v1), 2025-08-12
Supplement: Supplementary file 1 [file 25852c9295420ff440749cc5.xlsx]

## Sheet: Sheet1
Farm_ID	District/Location	LGAs	Gender	Age	Education	Yrs in dairy farming	Employees	Housing Design	Cow accomodation	Animals move out for grazing	Production system	Total animals	Total cattle	Water source	Water adlib	Feed supplements	Type of feed	Milker	Handwash/wear glove during milking	Clean teats as prep to milking	Dry teat before milking	Use separate clothe for cleaning	Pre-strip before milking	Teat dip/spraying before milking	Teat dip/spraying after milking	Milking method	Frequency of washing milking equip	Frequency of service milking equip	Dry cow therapy	Separate calving paddock	Heifers and cows same calving paddock	Buy replacement heifers	Feed cows after milking	Individual or group feeding	Suppliment to lactating cows	Mastitis main reason for culling	When check udder health per cow	Record treatment of cases of mastitis	Mastitis this year	Frequency	Who diagnosed	How diagnosed	Treat mastitis	Drug	Prescriber	Recurence mastitis Rx	Chalenges in mastitis Rx	Milking cows	Dry cows awaiting calving
#VALUE!	Kanke	Kanke	Male	57	Illiterate	40	1	Outdoor	Group	Yes	Extensive		52	River/Stream	Yes	No	Others	Family member	No	No	No	No	No	No	No	Hand	Daily	When broken		No	No	Yes	No			No	Never	No	0									15	4
79	Barkin Ladi	Barkin Ladi	Male	33	Primary school	20	4	Outdoor	Group	Yes	Semi-intensive	Large herds	300	Other	Yes	No	Grazing	Farmer	Yes	Only cows with dirty teats	No	No	Yes	No	No	Hand	Daily	When broken	No	No	Yes	No	Yes	Group	Lactating & dry	Yes	Daily before milking	No	1	Twice		Visual	Yes	Tylosin	Farmer	Yes	Medicine not working	70	11
80	Barkin Ladi	Barkin Ladi	Male	39	Primary school	25	3	Outdoor	Group	Yes	Extensive	Large herds	200	Other	Yes	No	Grazing	Farmer	No	Only cows with dirty teats	No	No	Yes	No	No	Hand	Daily	When broken	No	No	Yes	No	Yes	Group	Lactating & dry	Yes	Daily before milking	No	1	Twice	Farmer	Visual	Yes			Yes	Lack of animal health provider	30	9
81	Barkin Ladi	Barkin Ladi	Male	29	Primary school	15	2	Outdoor	Group	Yes	Semi-intensive	Large herds	100	Other	Yes	No	Grazing	Farmer	No	Only cows with dirty teats	No	No	Yes	No	No	Hand	Daily	When broken	No	No	Yes	No	Yes	Group	Lactating & dry	Yes	Daily before milking	No	1	Twice		Visual	Yes				Lack of animal health provider	25	10
82	Barkin Ladi	Barkin Ladi	Male	47	Illiterate	35	4	Outdoor	Group	Yes	Semi-intensive	Large herds	200	Other	Yes	No	Grazing	Farmer	Yes	Only cows with dirty teats	No	No	Yes	No	No	Hand	Daily	When broken	No	No	No		Yes	Group	Lactating & dry	Yes	Daily before milking	No	1	Twice	Veterinarian	Visual	Yes	Tylosin	Farmer		Lack of animal health provider	10	6
83	Barkin Ladi	Barkin Ladi	Male	39	High school	25	3	Outdoor	Group	Yes	Extensive	Large herds	58	Other	No	No	Grazing	Farmer	Yes	Only cows with dirty teats	No	No	Yes	No	No	Hand	Daily	When broken	No	No	Yes	No	Yes	Group	Lactating & dry	Yes	Daily before milking	No	1	Twice	Farmer	Visual	Yes	Tylosin	Farmer	Yes	Lack of animal health provider	20	10
84	Barkin Ladi	Barkin Ladi	Male	37	Primary school	20	3	Outdoor	Group	Yes	Semi-intensive	Large herds	200	Other	Yes	No	Grazing	Farmer	Yes	Only cows with dirty teats	No	No	Yes	No	No	Hand	Daily	When broken	No	No	Yes	No	Yes	Group	Lactating & dry	Yes		No	1	Twice	Farmer	Visual	Yes			Yes	Lack of animal health provider	45	20
85	Barkin Ladi	Barkin Ladi	Male	39	High school	25	5	Outdoor	Group	Yes	Extensive	Large herds	250	Other	No	No	Grazing	Farmer	Yes	Only cows with dirty teats	No	No	No	No	No	Hand	Daily	When broken	No	No	Yes	No	Yes	Group	Lactating & dry	Yes	Daily before milking	No	1	Twice	Farmer	Visual	Yes	Tylosin	Farmer	Yes	Lack of animal health provider	60	25
86	Barkin Ladi	Barkin Ladi	Male	47	Illiterate	35	4	Outdoor	Group	Yes	Extensive	Large herds	50	Other	No	No	Grazing	Farmer	Yes	Only cows with dirty teats	No	No	Yes	No	No	Hand	Daily	When broken	No	No	Yes	No	Yes	Group	Lactating & dry	Yes	Daily before milking	No	1	Twice	Farmer	Visual	Yes				Lack of animal health provider	10	20
87	Barkin Ladi	Barkin Ladi	Male	40	Illiterate	30	3	Outdoor	Group	Yes	Extensive	Large herds	200	Other	Yes	No	Grazing	Farmer	Yes	Only cows with dirty teats	No	No	Yes	No	No	Hand	Daily	When broken	No	No	Yes	No	Yes	Group	Lactating & dry	Yes	Daily before milking	No	1	Twice	Farmer	Visual	Yes		Farmer		Lack of animal health provider	40	20
88	Barkin Ladi	Barkin Ladi	Male	45	Illiterate	35	8	Outdoor	Group	Yes	Extensive	Large herds	200	Other	Yes	No	Grazing	Farmer	Yes	Only cows with dirty teats	No	No	Yes	No	No	Hand	Daily	When broken	No	No	Yes	No	Yes	Group	Lactating & dry	Yes	Daily before milking	No	1	Twice		Visual	Yes	Oxytet L.A		Yes	Lack of animal health provider	50	29
89	Barkin Ladi	Barkin Ladi	Male	30	Primary school	19	4	Outdoor	Group	Yes	Extensive	Large herds	150	Other	No	No	Grazing	Farmer	Yes	Only cows with dirty teats	No		Yes	No	Yes	Hand	Monthly	Monthly	No	No	Yes	No	Yes	Individual	Only lactating	Yes	Daily before milking	No	1	Twice		Visual	Yes	Tylosin	Farmer	Yes	Lack of animal health provider	60	10
90	Barkin Ladi	Barkin Ladi	Male	38	Primary school	25	6	Outdoor	Group	Yes	Extensive	Large herds	300	Other	Yes	No	Grazing	Farmer	Yes	Only cows with dirty teats	No	No	Yes	No	No	Hand	Daily	When broken	No	No	Yes	No	Yes	Group	Lactating & dry	Yes	Daily before milking	No	1	Twice	Farmer	Visual	Yes	Tylosin	Farmer		Lack of animal health provider	100	25
91	Barkin Ladi	Barkin Ladi	Male	35	High school	20	10	Outdoor	Group	Yes	Extensive	Large herds	350	Other	Yes	No	Grazing	Farmer	Yes	Only cows with dirty teats	No	No	No	No	No	Hand	Daily	When broken	No	No	Yes	No	Yes	Group	Lactating & dry	Yes	Daily before milking	No	1	Twice	Farmer	Visual	Yes	Oxytet L.A	Farmer	Yes	Lack of animal health provider	60	27
92	Barkin Ladi	Barkin Ladi	Male	29	Primary school	20	7	Outdoor	Group	Yes	Extensive	Large herds	200	Other	No	No	Grazing	Farmer	No	Only cows with dirty teats	No	No	No	No	No	Hand	Daily	When broken	No	No	Yes	No	Yes	Group	Lactating & dry	Yes	Daily before milking	No	1	Twice	Farmer	Visual	Yes	Gentamycin	Farmer	Yes	Lack of animal health provider	35	15
93	Barkin Ladi	Barkin Ladi	Male	39	Primary school	25	8	Outdoor	Group	Yes	Extensive	Large herds	200	Other	No	No	Grazing	Farmer	No	Only cows with dirty teats	No	No	No	No	No	Hand	Daily	When broken	No	No	Yes	No	Yes	Group	Lactating & dry	Yes	Daily before milking	No	1	Twice	Farmer	Visual	Yes	Tylosin	Farmer	Yes	Lack of animal health provider	36	21
94	Barkin Ladi	Barkin Ladi	Male	39	College/Diploma	20	4	Outdoor	Group	Yes	Extensive	Large herds	205	Lake/Dam	No	Yes	Grazing	Family member	No	No	No	No	No	No	No	Hand	Daily	When broken	No	No	Yes	No	No	Group		No	Never	No	1	Always	Farmer	Visual	Yes		Farmer	Yes	Lack of animal health provider	40	0
95	Barkin Ladi	Barkin Ladi	Male	35	Primary school	20	5	Outdoor	Group	Yes	Extensive	Large herds	200	Other	No	No	Grazing	Farmer	No	Only cows with dirty teats	No	No	No	No	No	Hand	Daily	When broken	No	No	Yes	No	Yes	Group	Lactating & dry	Yes	Daily before milking	No	1	Twice		Visual	Yes	Oxytet L.A	Farmer	Yes	Lack of animal health provider	50	29
96	Barkin Ladi	Barkin Ladi	Male	30	College/Diploma	30	2	Outdoor	Group	Yes	Extensive	Large herds	100	River/Stream	No	No	Grazing	Farmer	No	No	No	No	No	No	No	Hand	Daily	When broken	Selected cows	No	No	No	No	Group	Lactating & dry	Yes	Daily before milking	No	1	Twice	Farmer	Visual	Yes	Oxytet L.A	Farmer	Yes	Lack of animal health provider	35	5
97	Barkin Ladi	Barkin Ladi	Male	30	Primary school	20	3	Outdoor	Group	Yes	Extensive	Large herds	150	River/Stream	No	No	Grazing	Farmer	No	Only cows with dirty teats	No	No	No	No	No	Hand	Daily	When broken	Selected cows	No	No	No	No	Group	Lactating & dry	Yes	Daily before milking	No	1	Twice	Farmer	Visual	Yes	Oxytet L.A	Farmer	Yes	Lack of animal health provider	40	15
98	Barkin Ladi	Barkin Ladi	Male	47	Primary school	30	8	Outdoor	Group	Yes	Extensive	Large herds	70	River/Stream	No	No	Grazing	Farmer	No	Only cows with dirty teats	No	No	No	No	No	Hand	Daily	When broken	No	No	Yes	No	Yes	Group	Lactating & dry	Yes	Daily before milking	No	1	Twice		Visual	Yes	Oxytet L.A	Farmer	Yes	Lack of animal health provider	19	10
99	Barkin Ladi	Barkin Ladi	Male	35	Primary school	20	2	Outdoor	Group	Yes	Intensive	Large herds	150	River/Stream	No	No	Grazing	Farmer	No	Only cows with dirty teats	No	No	No	No	No	Hand	Daily	When broken	Selected cows	No	No	No	No	Group	Lactating & dry	Yes	Daily before milking	No	1	Always	Farmer	Visual	Yes	Oxytet L.A	Farmer	Yes	Lack of animal health provider	44	10
100	Barkin Ladi	Barkin Ladi	Male	40	Primary school	30	2	Outdoor	Group	Yes	Extensive	Large herds	200	River/Stream	No	No	Grazing	Farmer	No	Only cows with dirty teats	No	No	No	No	No	Hand	Daily	When broken	No	No	No	No	No	Group	Lactating & dry	Yes	Daily before milking	No	1	Twice	Farmer	Visual	Yes	Oxytet L.A	Historical effectiveness	Yes	Lack of animal health provider	40	25
101	Barkin Ladi	Barkin Ladi	Male	42	High school	30	2	Outdoor	Group	Yes	Extensive	Large herds	100	River/Stream	No	No	Grazing	Farmer	No	Only cows with dirty teats	No	No	No	No	No	Hand	Daily	When broken	Selected cows	No	No	No	Yes	Group	Lactating & dry	Yes	Daily before milking	No	1	Twice	Farmer	Visual	Yes	Oxytet L.A	Farmer	Yes	Medicine not working	30	25
102	Barkin Ladi	Barkin Ladi	Male	31	Primary school	20	4	Outdoor	Group	Yes	Extensive	Large herds	80	River/Stream	No	No	Grazing	Farmer	No	Only cows with dirty teats	No	No	No	No	No	Hand	Weekly	When broken	No	No	Yes	No	Yes	Group	Lactating & dry	Yes	Daily before milking	No	1	Twice	Farmer	Visual	Yes	Tylosin	Farmer	Yes	Lack of animal health provider	19	10
103	Barkin Ladi	Barkin Ladi	Male	27	High school	20	2	Outdoor	Group	Yes	Extensive	Large herds	150	River/Stream	No	No	Grazing	Farmer	No	Only cows with dirty teats	No	No	No	No	No	Hand	Daily	When broken	No	No	No	No	No	Group	Lactating & dry	Yes	Daily before milking	No	1	Twice	Farmer	Visual	Yes		Farmer	Yes	Lack of animal health provider	15	19
104	Barkin Ladi	Barkin Ladi	Male	28	Primary school	20	2	Outdoor	Group	Yes	Extensive	Large herds	100	River/Stream	No	No	Grazing	Farmer	No	Only cows with dirty teats	No	No	No	No	No	Hand	Daily	When broken	Selected cows	No	No	No	No	Group	Lactating & dry	Yes	Daily before milking	No	1	Twice	Farmer	Visual	Yes	Oxytet L.A		Yes	Lack of animal health provider	35	15
105	Barkin Ladi	Barkin Ladi	Male	27	College/Diploma	20	6	Outdoor	Individual	Yes	Semi-intensive	Large herds	200	Lake/Dam	No	No	Grazing	Farmer	Yes	Only cows with dirty teats	No	Yes	No	No		Machine	Daily	Annually	Selected cows	No	No	No	Yes	Group	Other	Yes	Daily before milking	No	1	Twice	Veterinarian	CMT	Yes	Oxytet L.A	Veterinarian	No	Lack of animal health provider	70	8
106	Barkin Ladi	Barkin Ladi	Male	28	High school	19	3	Outdoor	Group	Yes	Extensive	Large herds	200	Lake/Dam	No	No	Grazing	Farmer	No	Only cows with dirty teats	No	No	No	No	No	Hand	Daily	When broken	No	No	No	No	Yes	Group	Lactating & dry	Yes	Daily before milking	No	1	Twice	Farmer	Visual	Yes	Oxytet L.A	Farmer	Yes	Lack of animal health provider	58	48
107	Barkin Ladi	Barkin Ladi	Male	32	High school	20	3	Outdoor	Group	Yes	Intensive	Large herds	150	Lake/Dam	No	No	Grazing	Farmer	No	Only cows with dirty teats	No	No	No	No	No	Hand	Daily	When broken	No	No	No	No	No	Group	Lactating & dry	Yes	Daily before milking	No	1	Twice	Farmer	Visual	Yes	Oxytet L.A	Farmer	Yes	Lack of animal health provider	47	70
108	Barkin Ladi	Barkin Ladi	Male	29	College/Diploma	20	2	Outdoor	Group	Yes	Extensive	Large herds	350	River/Stream	No	No	Grazing	Farmer	No	Only cows with dirty teats	No	No	No	No	No	Hand	Weekly	When broken	No	No	No	No	Yes	Group	Lactating & dry	Yes	Daily before milking	No	1	Twice	Farmer	Visual	Yes	Oxytet L.A	Farmer	Yes	Lack of animal health provider	20	50
109	Barkin Ladi	Barkin Ladi	Male	52	Illiterate	40	15	Outdoor	Group	Yes	Extensive	Large herds	200	River/Stream	No	No	Grazing	Farmer	No	Only cows with dirty teats	No	No	No	No	No	Hand	Daily	When broken	No	No	Yes	No	Yes	Group	Lactating & dry	Yes	Daily before milking	No	1	Twice	Farmer	Visual	Yes	Tylosin	Farmer	Yes	Lack of animal health provider	40	15
110	Barkin Ladi	Barkin Ladi	Male	35	Primary school	20	4	Outdoor	Group	Yes	Extensive	Large herds	200	River/Stream	No	No	Grazing	Farmer	Yes	Only cows with dirty teats	No	No	Yes	No	No	Hand	Daily	When broken	No	No	Yes	No	Yes	Group	Lactating & dry	Yes	Daily before milking	No	1	Twice		Visual	Yes		Farmer		Lack of animal health provider	60	20
111	Bassa	Bassa	Male	53	Illiterate	30	6	Outdoor	Individual	Yes	Extensive	Large herds	50	Well/Borehole	Yes	Yes	Concentrate	Family member	Yes	No	No	No	No	No	No	Hand	Monthly		No	No	No	No	Yes	Group	Lactating & dry		Daily before milking	No	1	Always	Farmer	Bacterial culture	No			No	Medicine expensive	10	5
112	Bassa	Bassa	Male	48	Illiterate	30	5	Outdoor	Individual	Yes	Extensive	Large herds	34	River/Stream	Yes	No	Grazing	Family member	Yes	Only cows with dirty teats	No	No	No	No	No	Hand	Monthly		Dried off cows	No	Yes	Yes	Yes	Group	Lactating & dry	No	Daily before milking	Yes	1	Always	Farmer	Visual	Yes	Herbs		Yes	Lack of animal health provider	10	0
113	Bassa	Bassa	Male	50	Illiterate	32	5	Outdoor	Individual	Yes	Intensive	Large herds	30	River/Stream	Yes	No	Others	Family member	Yes	Only cows with dirty teats	Yes	Yes	No	No	No	Hand	Daily		No	No	Yes	Yes	Yes	Group	Lactating & dry	No	Daily before milking	No	0		Farmer	Visual	Yes		Farmer	Yes	Lack of animal health provider	5	0
114	Bassa	Bassa	Male	45	Illiterate	20	1	Outdoor	Individual	Yes	Extensive	Large herds	60	River/Stream	Yes	No	Grazing	Family member	No	Only cows with dirty teats	No	No	No	Yes	No	Hand	Monthly		Selected cows	No	No	No	Yes	Group	Lactating & dry	No	Daily before milking	No	0		Farmer	Visual	Yes	Herbs	Historical effectiveness	No	Lack of animal health provider	17	2
115	Bassa	Bassa	Male	38	High school	20	4	Outdoor	Group	Yes	Extensive	Large herds	24	River/Stream	Yes	No	Grazing	Family member	Yes	Only cows with dirty teats	No	No	No	No	No	Hand	Monthly		No	No	Yes	Yes	Yes	Group	Lactating & dry	No	Daily before milking	No	1	Always	Farmer	Visual	Yes		Farmer	Yes	Medicine not working	5	0
116	Bassa	Bassa	Male	65	Primary school	40	3	Other	Group	Yes	Extensive	Large herds	100	River/Stream	Yes	No	Grazing	Family member	Yes	Only cows with dirty teats	No	No	Yes	No	No	Hand	Daily	When broken		No	Yes	Yes	No		Only dry	Yes	Daily before milking	No	1	Thrice	Veterinarian	Bacterial culture	Yes		Veterinarian	No	Medicine expensive	20	15
117	Bassa	Bassa	Male	65		30	2	Other	Group	Yes	Extensive	Large herds	100	River/Stream	Yes	No	Grazing	Family member	Yes	Only cows with dirty teats	No	No	Yes	No	No	Hand	Daily	When broken		No	No	Yes	No	Group	Other	Yes	Weekly	No	0		Veterinarian	Bacterial culture	Yes		Veterinarian	No	Medicine expensive	10	4
118	Bassa	Bassa	Male	40		22	2	Outdoor	Individual	Yes		Large herds	30	River/Stream	Yes		Grazing	Family member	Yes	Only cows with dirty teats	No	No	No	Yes	Yes	Hand	Monthly		No	No		Yes	Yes	Group	Other	No	Daily before milking	Yes	0		Farmer	Visual			Historical effectiveness	No		10	1
119	Bassa	Bassa	Male	60	Primary school	20	3	Other		Yes	Extensive	Large herds	150	River/Stream	Yes	No	Grazing	Family member	Yes	Only cows with dirty teats	No	No	No	No	No	Hand	Daily	When broken	Dried off cows	No	Yes	No	Yes	Group	Only dry	Yes	Daily before milking	No	0		Veterinarian	Bacterial culture	Yes		Veterinarian	No	Medicine expensive	8	5
120	Bassa	Bassa	Male	25		25	2	Other	Group	Yes	Extensive	Large herds	100	River/Stream	Yes	No	Grazing	Family member	Yes	Only cows with dirty teats	Yes	Yes	Yes	No	No	Hand	Daily	Monthly		No	Yes	Yes	No	Group	Only dry	No	Daily before milking	Yes	1	Twice	Veterinarian	Visual	Yes		Veterinarian	No	Other	15	20
121	Bassa	Bassa	Male	40	Primary school	30	3	Other	Group	Yes	Extensive	Large herds	80	River/Stream	Yes	No	Grazing	Family member	Yes	Only cows with dirty teats	Yes	Yes	Yes	No	No	Hand	Daily	Monthly		No	Yes	Yes	No			No	Daily before milking	No	0		Veterinarian	Bacterial culture			Veterinarian	No	Medicine expensive	10	11
122	Bassa	Bassa	Male	43	Primary school	30	1	Other	Group	Yes	Extensive	Large herds	45	River/Stream	Yes	No	Grazing	Family member	Yes	Only cows with dirty teats	Yes	No	Yes	No	No	Hand	Daily	Annually		No	Yes	Yes	Yes	Group	Only dry	No	Daily before milking	No	0		Veterinarian						Medicine expensive	6	5
124	Bassa	Bassa	Male	39	Primary school	25	2	Other	Group	Yes	Extensive	Large herds	90	River/Stream	Yes	No	Grazing	Family member	Yes	All cows	No	No	Yes	No	No	Hand	Daily	When broken	No	No	Yes	No	Yes	Group	Lactating & dry	No	Daily before milking	No	0	Twice	Veterinarian	Visual	Yes		Veterinarian	No	Medicine expensive	15	9
128	Bassa	Bassa	Male	55		30	0	Other		Yes	Extensive	Large herds	70	River/Stream	Yes	No	Grazing	Family member	Yes	Only cows with dirty teats	Yes	Yes	Yes	No	No	Hand	Daily	Monthly		No	Yes	No	No		Lactating & dry	Yes	Daily before milking	No	1		Veterinarian	Bacterial culture	Yes	Oxytet L.A	Veterinarian	No	Medicine expensive	30	20
129	Bassa	Bassa	Male	55	Primary school	35	0	Other		Yes	Extensive	Large herds	20	River/Stream	Yes	No	Grazing	Family member	Yes	No	No	Yes	Yes	No	Yes	Hand	Weekly	When broken	No	No	Yes	Yes	No	Group	Lactating & dry	Yes	Daily before milking	No	0		Veterinarian	Bacterial culture	Yes		Veterinarian	No	Medicine expensive	20	20
130	Bassa	Bassa	Male	50		30	0	Other		Yes	Extensive	Large herds	80	River/Stream	Yes	No	Grazing	Family member	Yes	Only cows with dirty teats	Yes	No	No	No	No	Hand	Daily	When broken	No	No	No	Yes	No	Group	Lactating & dry	No	Daily before milking	No	0			Bacterial culture	Yes		Veterinarian		Lack of animal health provider	15	20
131	Bassa	Bassa	Male	67		40	0	Other	Individual		Extensive	Large herds	40	River/Stream	Yes	No	Grazing	Family member	Yes	No	No	No	Yes	No	No	Hand	Daily	Monthly	No	No	Yes	No		Group	Lactating & dry	No	Daily before milking	No	0		Farmer	Bacterial culture	Yes		Veterinarian	No	Lack of animal health provider	7	5
133	Bassa	Bassa	Male	50	Primary school	30	0	Other	Group	Yes	Extensive	Large herds	50	Well/Borehole	Yes	No	Grazing	Family member	Yes	Only cows with dirty teats	Yes	Yes	Yes	No	No	Hand	Daily	Monthly		No	Yes	Yes	No	Group	Lactating & dry	No	Daily before milking	Yes	1		Veterinarian	Visual	Yes	Oxytet L.A	Veterinarian	No	Medicine expensive	10	10
135	Bassa	Bassa	Male	35		20	0	Other	Group	Yes	Extensive	Large herds	50	River/Stream	Yes	No	Grazing	Family member	Yes	Only cows with dirty teats	Yes	No	Yes	No	No	Hand	Daily	When broken	No	No	Yes	No	No	Group	Lactating & dry	No	Daily before milking	No	1		Veterinarian	Visual	No	Oxytet L.A	Veterinarian		Lack of animal health provider	10	10
136	Bassa	Bassa	Male	42		22	0	Other	Group	Yes	Extensive	Large herds	50	River/Stream	Yes	No	Grazing	Family member	Yes	Only cows with dirty teats	Yes	No	Yes	No	No	Hand	Daily	Monthly	No	No	No	No	No	Group	Lactating & dry	No	Daily before milking	No	0		Veterinarian	Bacterial culture	Yes			No	Lack of animal health provider	6	7
140	Bassa	Bassa	Male	45		30	0	Other		Yes	Extensive	Large herds	150	River/Stream	Yes	No	Grazing	Family member	Yes	Only cows with dirty teats		No	No	No	No	Hand	Daily	When broken	No	No	Yes	Yes	Yes	Individual	Only lactating	No	Daily before milking	No	0		Veterinarian	Bacterial culture	Yes		Veterinarian	No	Medicine not working	11	4
141	Bassa	Bassa	Male	63		50	0	Other	Group	Yes	Semi-intensive	Large herds	200	River/Stream	Yes	No	Grazing	Family member	Yes	Only cows with dirty teats	Yes	Yes	Yes	No	No	Hand	Daily		Selected cows	Yes	Yes	No	No			No	Daily before milking	No	0		Veterinarian	Bacterial culture	Yes		Veterinarian	No	Medicine expensive	30	20
142	Bassa	Bassa	Male	47	Illiterate	20	0	Other		Yes	Extensive	Large herds	40	River/Stream	Yes	No	Grazing	Family member	No	Only cows with dirty teats	Yes	No	Yes	No	No	Hand	Daily	Monthly	No	No	No	No	Yes	Group	Lactating & dry	No	Daily before milking	No	0		Veterinarian	Bacterial culture	Yes		Veterinarian		Lack of animal health provider	5	4
47	Bokkos	Bokkos	Male					Outdoor	Group	Yes	Semi-intensive	Large herds	42	Other	No	No	Others	Family member	No	No	No	No	No	No	No	Hand	Daily	Monthly	No	No	No	No	No		Other	No	Weekly	No	1	Twice	Veterinarian	Visual	No			No		7	8
48	Bokkos	Bokkos	Male	20	Primary school	20	4					Large herds	105				Others	Family member	No	Only cows with dirty teats	No	Yes	Yes	Yes	Yes	Hand	Daily	Monthly	Selected cows	No	No	Yes	No	Individual	Only lactating	Yes	Daily before milking	Yes	0			Visual	No		Veterinarian	No	Medicine expensive	31	19
49	Bokkos	Bokkos	Male	42	Primary school	42	6	Outdoor	Group	Yes	Semi-intensive	Large herds	96	Lake/Dam	Yes	No	Grazing	Family member	No	No	No	No	No	No	No	Hand	Daily	When broken	No	No	No	No	No		Other	No	Weekly	No	1	Thrice		Visual	No		Veterinarian	Yes	Lack of animal health provider	22	20
50	Bokkos	Bokkos	Male	20		7	4		Group	Yes	Intensive	Large herds	83	Other	No	No	Grazing	Family member	No	Only cows with dirty teats	No	Yes	Yes	Yes	Yes	Hand	Daily	Monthly	No	No	No	No	Yes		Lactating & dry	No	Daily before milking	Yes	0			Visual	No		Veterinarian	Yes	Medicine expensive	19	12
51	Bokkos	Bokkos	Male	21	University	7	3	Other	Group	Yes	Intensive	Large herds	161	Other		No	Grazing	Family member	No	Only cows with dirty teats	No	Yes	Yes	No	No	Hand	Daily	Annually	No	No	Yes	No	Yes	Group	Lactating & dry	No	Daily before milking	Yes	1		Other	Visual	No	Oxytet L.A	Veterinarian	Yes	Medicine expensive	40	35
52	Bokkos	Bokkos	Male	27		8	5		Group	Yes	Intensive	Large herds	102	Other	No	No	Concentrate	Family member	No	Only cows with dirty teats	No	Yes	Yes	Yes	Yes	Hand	Daily	When broken	No	No	No	No	Yes	Group	Lactating & dry	No	Daily before milking	Yes	0		Other	Visual	No		Veterinarian	Yes	Medicine expensive	20	20
53	Bokkos	Bokkos	Male	23	Primary school	4	4		Individual	Yes	Intensive	Large herds	78	Other	No	No	Concentrate	Family member	No	Only cows with dirty teats	No	Yes	Yes	Yes	Yes	Hand	Daily	Annually	No	No	No	No	Yes	Group	Lactating & dry	No	Daily before milking	Yes	0			Visual	No		Veterinarian	Yes	Medicine expensive	19	30
54	Bokkos	Bokkos	Male	47			4	Outdoor		Yes	Extensive	Large herds	70	Lake/Dam	Yes	No	Grazing	Farmer	No	No	No	No	No	No	No	Hand	Daily	Annually	No	Yes	Yes	Yes	Yes	Group	Lactating & dry	Yes	Daily before milking	No	0		Farmer	Visual	Yes			No	Medicine expensive	30	11
55	Bokkos	Bokkos	Male	20	High school	20	2	Other	Group	Yes		Large herds	203	Lake/Dam	No	No	Concentrate	Farmer	No	Only cows with dirty teats	No	No	No	No	No	Hand	Daily	When broken	Dried off cows	No	No	No	No	Group	Lactating & dry	No	Never	No	1	Twice	Farmer	Visual	No		Farmer	Yes	Medicine expensive	30	15
56	Bokkos	Bokkos	Male	40	Primary school	40	3	Outdoor	Group	Yes	Semi-intensive	Large herds	79	Lake/Dam	Yes	No	Grazing	Farmer	No	No	No	No	No	No	No	Hand	Daily	Annually	No	No	No	No	No		Other	No	Weekly	No	0	Twice	Veterinarian	Visual	No			No	Lack of medicine	22	10
57	Bokkos	Bokkos	Male	38	Primary school	38	5	Outdoor	Group	Yes	Extensive	Large herds	203	River/Stream	Yes	No	Others	Family member	No	No	No	No	No	No	No	Hand	Daily	Annually	No	No	Yes	No	No	Group		Yes	When abnormal	No	1	Twice			No			Yes	Lack of medicine	46	68
58	Bokkos	Bokkos	Male	30	University	30	4	Outdoor	Group	Yes	Extensive	Large herds	118	Lake/Dam	No	No	Grazing	Farmer	No	Only cows with dirty teats	No	No	No	No	No	Hand	Daily	Annually	No	No	No	No	No		Other	No	Weekly	No	1	Twice	Veterinarian	Visual	No		Veterinarian	No	Lack of animal health provider	21	14
59	Bokkos	Bokkos	Male	36	College/Diploma	36	4	Outdoor	Group	Yes	Extensive	Large herds	103	Lake/Dam	Yes	No	Grazing	Farmer	No	Only cows with dirty teats	No	No	No	No	No	Hand	Daily	Annually	No	No	No	No	No		Other	No	Weekly	No	1	Twice	Veterinarian	Visual	No		Veterinarian	No	Lack of animal health provider	20	15
60	Bokkos	Bokkos	Male	32	Primary school	32	2	Outdoor	Group	Yes	Extensive	Large herds	25	Lake/Dam	Yes	No	Grazing	Farmer	No	No	No	No	No	No	No	Hand	Daily	Annually	No	No	No	No	No		Other	No	Daily before milking	No	1	Twice	Veterinarian	Visual	No		Historical effectiveness		Lack of animal health provider	4	3
61	Bokkos	Bokkos	Male			11	3		Group	Yes	Intensive	Large herds	122	Other	No	No	Grazing	Family member	No	Only cows with dirty teats	Yes	Yes	Yes	Yes	Yes	Hand	Daily	When broken	No	No	No	No	Yes	Group	Lactating & dry	No	Daily before milking	Yes	0			Visual	No		Veterinarian	Yes	Medicine expensive	30	15
62	Bokkos	Bokkos	Male	35	Primary school	35	3	Outdoor	Group	Yes	Smallholder	Large herds	38	Lake/Dam	Yes	Yes	Concentrate	Family member	Yes	No	No	No	Yes	No	No	Hand	Daily	When broken	No	No	No	Yes	Yes	Group	Lactating & dry	No	Daily before milking	No	0		Veterinarian	Bacterial culture	No		Veterinarian	Yes	Medicine expensive	3	7
63	Bokkos	Bokkos	Male	30	Primary school	10	1	Outdoor	Individual	Yes	Smallholder	Large herds	21	Other	Yes	No	Grazing	Farmer	Yes	No	No	No	No	Yes	No	Machine	Daily	Monthly	Selected cows	No	Yes	No	Yes	Group	Lactating & dry	No	Daily before milking	No	0		Veterinarian	Visual	Yes	Sulphonamides	Veterinarian	Yes	Lack of animal health provider	5	4
64	Bokkos	Bokkos	Male					Outdoor	Individual	Yes	Smallholder	Large herds	38	Other	Yes	Yes	Concentrate	Farmer	Yes	No	No	No	No	Yes	No	Hand	Daily	Monthly	No	Yes	Yes	Yes	Yes	Individual	Lactating & dry	No	Daily before milking	No	1	Twice	Veterinarian	Visual	Yes	Sulphonamides	Veterinarian	Yes	Lack of animal health provider	7	3
65	Bokkos	Bokkos	Male	22		22	3	Outdoor	Group	Yes	Extensive	Large herds	46	Other	Yes	No	Others	Family member	No	No	No	No	No	No	No	Hand	Daily	Annually	No	No	Yes	No	No		Other	No	Never	No	1	Thrice			No			Yes	Lack of medicine	13	11
66	Bokkos	Bokkos	Male	49	Primary school	49	5	Outdoor	Group	Yes	Extensive	Large herds	100	Other	No	No	Others	Family member	No	No	No	No	No	No	No	Hand	Daily	Annually	No	Yes	No	No	No		Other	No	Daily before milking	No	1	More than thrice	Other		No			No	Lack of medicine	30	10
67	Bokkos	Bokkos	Male	42	Primary school	42	3	Outdoor	Group	Yes	Extensive	Large herds	36	Other	Yes	Yes	Others	Family member	No	No	No	No	No	No	No	Hand	Daily	Annually	No	Yes	Yes	No	No		Other	Yes	Never	No	1	Thrice			No				Lack of medicine	7	5
68	Bokkos	Bokkos	Male	35	Primary school	35	4	Outdoor	Group	Yes	Extensive	Large herds	33	Lake/Dam	Yes	No	Grazing	Family member	No	No	No	No	No	No	No	Hand	Daily	Monthly	No	No	No	No	No	Group	Other	No	Weekly	Yes	0	Thrice	Veterinarian	Visual	Yes		Veterinarian	No	Lack of animal health provider	6	5
69	Bokkos	Bokkos	Male	38	College/Diploma	38	3	Outdoor	Group	Yes	Extensive	Large herds	100	River/Stream	Yes	No	Others	Family member	No	No	Yes	No	No	No	No	Hand	Daily	Annually		No	No	No	No			Yes	Never	No	1	Twice	Veterinarian		No			Yes	Lack of medicine	20	15
70	Bokkos	Bokkos	Male	32	University	32	4	Outdoor	Group	Yes	Extensive	Large herds	79		Yes	No	Others	Farmer	No	No	No	No	No	No	No	Hand	Daily	Monthly	No	Yes	Yes	No	No		Other	No	Never	No	1	More than thrice	Other	Bacterial culture	No			Yes	Lack of medicine	16	5
71	Bokkos	Bokkos	Male	42	College/Diploma	42	3	Outdoor	Group	Yes	Extensive	Large herds	150	River/Stream	Yes	No	Others	Farmer	No	No	No	No	No	No	No	Hand	Daily	Annually	No	Yes	Yes	No	No		Other	Yes	Never	No	1	More than thrice	Other		No				Lack of animal health provider	37	27
72	Bokkos	Bokkos	Male	38	High school	38	3	Outdoor	Group	Yes	Extensive	Large herds	25	Other	Yes	No	Others	Farmer	No	No	No	No	No	No	No	Hand	Daily	Annually		No	No	No	No			No	Never	No	1		Veterinarian		Yes			No	Lack of medicine	3	3
73	Bokkos	Bokkos	Male	43	High school	43	3	Outdoor	Group	Yes	Extensive	Large herds	35	Other	Yes	No	Others	Family member	Yes	No	No	No	No	No	No	Hand	Daily	Annually		No	No	No	No			Yes	When abnormal	No	1	Twice			No				Lack of medicine	6	2
74	Bokkos	Bokkos	Male	33	Primary school	20	2	Other	Group	Yes	Extensive	Large herds	64	River/Stream	Yes	Yes	Concentrate	Farmer	Yes	Only cows with dirty teats	Yes	Yes	Yes	No	No	Hand	Daily	Annually	Selected cows	No	No	No	Yes	Group	Lactating & dry	Yes	Daily before milking	Yes	1	Twice	Farmer	Visual	Yes		Veterinarian	Yes	Lack of animal health provider	17	18
75	Bokkos	Bokkos	Male	40	High school	40	3	Outdoor	Group	Yes	Extensive	Large herds	120	River/Stream	No	No	Grazing	Family member	No	No	No	No	No	No	No	Hand	Daily	Annually	No	Yes	No	No	No		Other	Yes	Never	No	0		Other		No			No	Lack of medicine	24	15
76	Bokkos	Bokkos	Male	26	High school	26	3	Outdoor	Group	Yes	Extensive	Large herds	76	Other	No	No	Others	Farmer	No	Only cows with dirty teats	No	Yes	No	No	No	Hand	Daily	When broken	No	No	Yes	No	Yes	Group	Lactating & dry	No	Never	No	0		Farmer	CMT	No		Farmer	No	Medicine expensive	21	8
77	Bokkos	Bokkos	Male	35		35	3	Outdoor	Group	Yes	Extensive	Large herds	45	Well/Borehole	No		Grazing	Family member	No	No	Yes	No	No	No	No	Hand	Daily	Monthly	No		No	No	No		Other	No	Daily before milking	No	1	Twice	Veterinarian	Visual	No			No		9	10
78	Bokkos	Bokkos	Male	42	Primary school	42	4		Group	Yes	Intensive	Large herds	89	Other	No	No	Grazing	Family member	No	Only cows with dirty teats	No	Yes	Yes	Yes	Yes	Hand	Weekly	When broken	No	No	No	No	Yes		Lactating & dry	No	Daily before milking	Yes	0			Visual	No			Yes	Medicine expensive	29	15
9	Federal Jos East	Jos East	Male	28	Illiterate	21	2	Outdoor	Group	Yes	Extensive	Large herds	25	River/Stream	Yes	No	Grazing	Farmer	Yes	Only cows with dirty teats	No	No	No	No	No	Hand	Daily	When broken	No	No	No	No	No		Other	No	When abnormal	No	0		Farmer	Visual	Yes	Oxytet L.A	Farmer	No	Other	3	8
10	Federal Jos East	Jos East	Male	37	Illiterate	28	2	Outdoor	Group	Yes	Extensive	Large herds	30	River/Stream	Yes	No	Grazing	Farmer	Yes	Only cows with dirty teats	No	No	No	No	No	Hand	Daily	When broken	No	No	No	No	No		Other	No	Never	No	0		Farmer	Visual	No			No	Other	4	7
11	Federal Jos East	Jos East	Male	28	Illiterate	20	1	Outdoor	Group	Yes	Extensive	Large herds	20	River/Stream	Yes	No	Grazing	Farmer	Yes	Only cows with dirty teats	No	No	No	No	No	Hand	Daily	When broken	No	No	No	No	No		Other	No	Never	No	0		Farmer	Visual	No			No	Other	3	8
12	Federal Jos East	Jos East	Male	38	Primary school	28	3	Outdoor	Group	Yes	Extensive	Large herds	65	River/Stream	Yes	No	Grazing	Farmer	Yes	Only cows with dirty teats	No	No	No	No	No	Hand	Daily	When broken	No	No	No	No	No		None	No	Never	No	0		Farmer	Visual	No			No	None	10	8
13	Federal Jos East	Jos East	Male	33	Illiterate	22	1	Outdoor	Group	Yes	Extensive	Large herds	20	River/Stream	Yes	No	Grazing	Farmer	Yes	Only cows with dirty teats	No	No	No	No	No	Hand	Daily	When broken	No	No	No	No	No		None	No	Never	No	1		Farmer		No			No	None	4	3
14	Federal Jos East	Jos East	Male	39	Illiterate	29	2	Outdoor	Group	Yes	Extensive	Large herds	40	River/Stream	Yes	No	Grazing	Farmer	Yes	Only cows with dirty teats	No	No	No	No	No	Hand	Daily	When broken	No	No	No	No	No		None	No	When abnormal	No	0		Farmer	Visual	No			No	None	7	3
15	Federal Jos East	Jos East	Male	31	Primary school	22	1	Outdoor	Group	Yes	Extensive	Large herds	30	River/Stream	Yes	No	Grazing	Farmer	Yes	Only cows with dirty teats	No	No	No	No	No	Hand	Daily	When broken	No	No	No	No	No		None	No	When abnormal	No	0		Farmer	Visual	No			No	None	6	4
15	Federal Jos East	Jos East	Male	40	Illiterate	1	1	Indoor	Group	Yes	Intensive	Large herds	50	Lake/Dam	No	No	Concentrate	Farmer	Yes	No	No	Yes	Yes	Yes	Yes	Hand	Daily	Annually	No	Yes	Yes	Yes	Yes	Group	Only lactating	Yes	Daily before milking	Yes	1	Always		Bacterial culture	Yes		Veterinarian	Yes	Lack of medicine	14	6
16	Federal Jos East	Jos East	Male	25	Primary school	12	3	Other		Yes	Extensive	Large herds		River/Stream	Yes	Yes	Grazing	Family member	Yes	Only cows with dirty teats	No	Yes	Yes	No	No	Hand	Daily	When broken	No	No	Yes	Yes	Yes	Group	Lactating & dry	No	Daily before milking	Yes	1	Twice	LEO	Visual	Yes	Oxytet L.A	Veterinarian	No	Medicine expensive	8	0
17	Federal Jos East	Jos East	Male	40	Primary school	9	4	Other		Yes	Extensive	Large herds	29	River/Stream	Yes	No	Grazing	Family member	Yes	Only cows with dirty teats	Yes	Yes	Yes	No	No	Hand	Daily	Monthly	No	No	Yes	No	Yes	Group	Only dry	Yes	Weekly	No	1		Farmer	Visual	Yes	Oxytet L.A	Veterinarian	No	Medicine expensive	8	5
18	Federal Jos East	Jos East	Male	35	High school	25	6	Other	Group	Yes	Extensive	Large herds	60	River/Stream	Yes	Yes	Others	Farmer	Yes	Only cows with dirty teats	No	No	No	No	No	Hand	Daily	When broken	No	No	Yes	No	Yes		Lactating & dry	No	Daily before milking	No	0		Farmer	Visual	No			No		10	23
236	Federal Jos East	Jos East	Male	30	Illiterate	20	4	Other	Group	Yes	Extensive	Large herds	150	River/Stream		Yes	Grazing	Farmer	Yes	Only cows with dirty teats	No	No	No	No	No	Hand	Daily	When broken	No	No	Yes	No	No		Other	No	Never	No	1		Farmer	Visual	No			No	None	6	20
237	Federal Jos East	Jos East	Male	43	Illiterate	30	1	Outdoor	Group	Yes	Extensive	Large herds	20	Lake/Dam	Yes	No	Grazing	Farmer	Yes	Only cows with dirty teats	No	No	No	No	No	Hand	Daily	When broken	No	No	No	No	No		None	No	Never	No	0		Farmer	Visual	No			No	None	8	2
237	Federal Jos East	Jos East	Male	41	Illiterate	30	1	Outdoor	Group	Yes	Extensive	Large herds	20	River/Stream	Yes	No	Grazing	Farmer	Yes	Only cows with dirty teats	No	No	No	No	No	Hand	Daily	When broken	No	No	No	No	No		Other	No	Never	No	1		Farmer	Visual	No			No		3	5
238	Federal Jos East	Jos East	Male	28	Primary school	19	2	Outdoor	Group	Yes	Extensive	Large herds	32	River/Stream	Yes	No	Grazing	Farmer	Yes	Only cows with dirty teats	No	No	No	No	No	Hand	Daily	When broken	No	No	No	No	No		None	No	When abnormal	No	0		Farmer		No			No	None	5	3
143	Kanam	Kanam	Male	51	Primary school	37		Outdoor	Group	Yes	Extensive	Large herds	147	Lake/Dam	Yes	Yes	Grazing	Farmer	Yes	Only cows with dirty teats	No	No	No	No	No	Hand	Daily	Annually	Dried off cows	No	No	No	No	Group	Lactating & dry	No		No	0									37	5
144	Kanam	Kanam	Male	31		17	2	Outdoor	Group	Yes		Large herds	32		Yes	No	Others	Farmer	No	No	No	No	No	No	No	Hand	Daily	Annually	No	Yes	No	Yes	Yes	Individual	Lactating & dry	Yes	Daily before milking	No	0									8	2
145	Kanam	Kanam	Male		Illiterate	60		Outdoor	Group	Yes	Extensive	Large herds	157	Lake/Dam	Yes	No	Others	Farmer	No	All cows	No	No	No	No	No	Hand	Daily	Annually	Dried off cows	No	No	No	No	Group	Lactating & dry	No	Daily before milking	Yes	1	Twice		Visual	Yes	suphonamides		No	Lack of medicine	45	9
146	Kanam	Kanam	Male	44				Outdoor	Group	Yes		Large herds	93		Yes	No	Others	Family member	Yes	Only cows with dirty teats	No	No	No	No	No	Hand	Daily	Annually	Dried off cows	No	No	No	No	Group	Lactating & dry	No	Daily before milking	No	0		Veterinarian				Farmer		Medicine expensive	25	20
147	Kanam	Kanam	Male			45		Indoor	Group	Yes	Semi-intensive	Large herds	78	Lake/Dam	No	No	Others	Family member	Yes	All cows	No	No	No	No	No	Hand	Daily	Annually	Dried off cows	No	No	No	No	Group	Lactating & dry	No	Daily before milking	No	0	Always	Veterinarian	Bacterial culture	No		Farmer	No	Lack of medicine	10	4
148	Kanam	Kanam	Male			50		Outdoor	Group	No	Extensive	Large herds	80	Lake/Dam	No	No	Others	Family member	No	No	No	No	No	No	No	Hand	Daily	Annually	Dried off cows	No	No	No	No	Group	Lactating & dry	No	Daily before milking	No	0	Always	Veterinarian	Bacterial culture	No		Farmer	No	Lack of medicine	25	6
149	Kanam	Kanam	Male			40		Indoor	Group	Yes	Semi-intensive	Large herds	185	Lake/Dam	Yes	No	Others	Family member	No	No	No	No	No	No	No	Hand	Daily	Annually	Dried off cows	No	No	No	No	Group	Lactating & dry	No	Daily before milking	No	1	Always	Veterinarian	Bacterial culture	Yes		Farmer	No	Lack of medicine	50	9
150	Kanam	Kanam	Male	57	Primary school	42		Outdoor	Group	Yes	Extensive	Large herds	134	Lake/Dam	Yes	Yes	Others	Farmer	Yes	Only cows with dirty teats	No	No	No	No	No	Hand	Daily	Annually	Dried off cows	No	No	No	No	Group	Lactating & dry	No	Daily before milking	No	0									31	10
151	Kanam	Kanam	Male			55		Outdoor	Group	Yes	Extensive	Large herds	90	Lake/Dam	No	No	Others	Farmer	Yes	No	No	No	No	No	No	Hand	Daily	Annually	Dried off cows	No	No	No	No	Group	Lactating & dry	No	Daily before milking	Yes	0	Always	Veterinarian	Bacterial culture	Yes		Farmer	No	Lack of medicine	30	10
152	Kanam	Kanam	Male	43		23		Outdoor	Group	Yes	Extensive	Large herds	56	Lake/Dam	Yes	No	Others	Farmer	No	Only cows with dirty teats	No	No	No	No	No	Hand	Daily	Annually	Dried off cows	No	No	No	No	Group	Lactating & dry	No	Daily before milking	No	0		Veterinarian	Bacterial culture	Yes		Farmer	No	Lack of medicine	16	9
153	Kanam	Kanam	Male	43	Illiterate	25		Outdoor	Group	Yes	Extensive	Large herds	72	Lake/Dam	Yes	Yes	Others	Farmer	Yes	Only cows with dirty teats	No	No	No	No	No	Hand	Daily	Monthly	Dried off cows	No	No	No	No	Group	Lactating & dry	No	Daily before milking	No	0									17	7
154	Kanam	Kanam	Male	47	Primary school	21		Outdoor	Group	Yes		Large herds	74	Pipeline	No		Blocks	Family member	No	Only cows with dirty teats	Yes	Yes	No	No	No	Hand	Daily			No	No	No	No	Group	Lactating & dry	No	Daily before milking	No	1									21	8
155	Kanam	Kanam	Male		High school	30		Indoor	Group	Yes	Extensive	Large herds	55	Lake/Dam	Yes	No	Others	Family member	No	No	No	No	No	No	No	Hand	Daily	Annually	Dried off cows	No	No	No	No	Group	Lactating & dry	No	Daily before milking	No	1	Always	Veterinarian	Bacterial culture	Yes		Farmer	No	Lack of medicine	40	10
156	Kanam	Kanam	Male	47	Illiterate	28		Outdoor	Group	Yes	Extensive	Large herds	87	Pipeline	Yes	Yes	Others	Farmer	Yes	Only cows with dirty teats	No	No	No	No	No	Hand	Daily												0									22	9
157	Kanam	Kanam	Male	37	Primary school	20		Outdoor	Group	Yes	Extensive	Large herds	78	Lake/Dam	Yes	Yes	Others	Farmer	Yes	Only cows with dirty teats	No	No	No	No	No	Hand	Daily	Annually	Dried off cows	No	No	No	No	Group	Lactating & dry		Daily before milking	No	0									21	7
158	Kanam	Kanam	Male			50		Indoor	Group	Yes	Extensive	Large herds	69	Lake/Dam	No	No	Others	Family member	Yes	All cows	No	No	No	No	No	Hand	Daily	Annually	Dried off cows	No	No	No	No	Group	Lactating & dry	No	Daily before milking	No	0	Always	Veterinarian	Bacterial culture	Yes		Farmer	No	Lack of medicine	19	5
159	Kanam	Kanam	Male			27		Outdoor	Group	Yes	Extensive	Large herds	90	Lake/Dam	No	No	Others	Farmer	Yes	All cows	No	No	No	No	No	Hand	Daily	Annually	Dried off cows	No	No	No	No	Group	Lactating & dry	No	Daily before milking	No	0	Always	Veterinarian	Bacterial culture	Yes		Farmer	No	Lack of medicine	35	5
160	Kanam	Kanam	Male	52	College/Diploma	34		Outdoor	Group	Yes	Extensive	Large herds	48	Lake/Dam	Yes	No	Others	Family member	Yes	All cows	Yes	Yes	Yes	Yes	Yes	Hand	Daily	Annually	Dried off cows	No	No	No	No	Group	Only lactating	No	Daily before milking	No	0	Always	Veterinarian	Bacterial culture	Yes	Oxytet L.A	Farmer	Yes	Lack of medicine	19	5
161	Kanam	Kanam	Male	51	Primary school	35		Outdoor	Group	Yes	Extensive	Large herds	47		Yes	No	Others	Family member	No	Only cows with dirty teats		Yes	No	No	No	Hand	Daily	Annually	Dried off cows	No	No	No	No	Group	Lactating & dry	Yes	Daily before milking	Yes	1	Twice	Veterinarian	Bacterial culture	Yes		Farmer	No	Medicine expensive	9	6
162	Kanam	Kanam	Male			39		Outdoor	Group	Yes	Extensive	Large herds	85	Lake/Dam	Yes	Yes	Others	Farmer	Yes	All cows	No	No	No	No	No	Hand	Daily	Annually	Dried off cows	No	No	No	No	Group		No	Daily before milking	No	1	Always	Veterinarian	Bacterial culture	Yes		Farmer	Yes	Lack of medicine	30	5
163	Kanam	Kanam	Male	52	High school	37		Outdoor	Group	Yes	Semi-intensive	Large herds	64	Lake/Dam	Yes	No	Others	Farmer	No	No	No	No	No	No	No	Hand	Daily	Monthly	Dried off cows	No	No	No	No	Group	Lactating & dry	No	Daily before milking	Yes	1		Veterinarian	Bacterial culture	Yes	Sulphonamides		No	Lack of medicine	18	6
164	Kanam	Kanam	Male			27		Outdoor	Group	No	Extensive	Large herds	110	Lake/Dam	No	No	Others	Farmer	Yes	No	No	No	No	No	No	Hand	Daily	Annually	Dried off cows	No	No	No	No	Group	Lactating & dry	No	Daily before milking	No	1	Always	Veterinarian	Bacterial culture	Yes		Farmer	Yes	Lack of medicine	40	15
165	Kanam	Kanam	Male		High school	18		Outdoor	Group	Yes	Extensive	Large herds	74	Lake/Dam	Yes	No	Others	Family member	No	No	No	No	No	No	No	Hand	Daily	Annually	Dried off cows	No	No	No	No	Group	Lactating & dry	No	Daily before milking	No	1	Always	Veterinarian	Bacterial culture	Yes		Farmer	No	Lack of medicine	22	12
166	Kanam	Kanam	Male	50				Outdoor	Group	No	Extensive	Large herds	75	Lake/Dam	No	No	Others	Farmer	Yes	All cows	No	No	No	No	No	Hand	Daily	Annually	Dried off cows	No	No	No	No	Group	Lactating & dry		Daily before milking	No	1	Always	Veterinarian	Bacterial culture	Yes		Farmer	No	Lack of medicine	18	5
167	Kanam	Kanam	Male	32	Primary school	20		Outdoor	Group	Yes	Semi-intensive	Large herds	93	Lake/Dam	Yes	Yes	Others	Farmer	Yes	All cows	No	No	No	No	No	Hand	Daily	Annually	Dried off cows	No	No	No	No	Group	Lactating & dry	No	Daily before milking	No	0									23	4
168	Kanam	Kanam	Male	49				Outdoor	Group	No	Extensive	Large herds	67	Lake/Dam	No	No	Others	Family member	No	No	No	No	No	No	No	Hand	Daily	Annually	Dried off cows	No	No	No	No	Group	Lactating & dry	No	Daily before milking	No	1	Always	Veterinarian	Bacterial culture	Yes		Farmer	No	Lack of medicine	26	8
169	Kanam	Kanam	Male		High school	15		Outdoor	Group	Yes	Extensive	Large herds	65	Lake/Dam	Yes	No	Others	Family member	No	No	No	No	No	No	No	Hand	Daily	Annually	Dried off cows	No	No	No	No	Group	Lactating & dry	No	Daily before milking	No	1	Always	Veterinarian	Bacterial culture	Yes		Farmer	No	Lack of medicine	20	6
170	Kanam	Kanam	Male			35		Outdoor	Group	Yes	Extensive	Large herds	60	Lake/Dam	No	No	Others	Farmer	Yes	Only cows with dirty teats	No	No	No	No	No	Hand	Daily	Annually	Dried off cows	No	No	No	No	Group	Lactating & dry	No	Daily before milking	No	1	Always	Veterinarian	Bacterial culture	Yes		Farmer	Yes	Lack of medicine	15	3
171	Kanam	Kanam	Male	40				Outdoor	Group	No	Extensive	Large herds	100	Lake/Dam	No	No	Others	Farmer	Yes	No	No	No	No	No	No	Hand	Daily	Annually	Dried off cows	No	No	No	No	Group	Only lactating	Yes	Weekly	No	1	Always	LEO	Visual	Yes		Veterinarian	No	Lack of medicine	35	6
172	Kanam	Kanam	Male	50				Indoor		Yes	Extensive	Large herds	60	Lake/Dam	No	No	Others	Family member	Yes	No	No	No	No	No	No	Hand	Daily	Annually	Dried off cows	No	No	No	No	Group	Lactating & dry	No	Daily before milking	No	1	Always	Veterinarian	Bacterial culture	Yes		Historical effectiveness	Yes	Lack of medicine	20	5
173	Kanam	Kanam	Male	45				Indoor	Group	Yes	Extensive	Large herds	65	Lake/Dam	No	No	Others	Family member	Yes	No	No	No	No	No	No	Hand	Daily	Annually	Dried off cows	No	No	No	No	Group	Lactating & dry	No	Daily before milking	No	1	Always	Veterinarian	Bacterial culture	Yes		Farmer	Yes	Lack of medicine	15	4
174	Kanke	Kanke	Male	42	Primary school	30	1	Outdoor		Yes	Extensive	Large herds	30	River/Stream		Yes	Others	Farmer	No	No	No	No	No	No	No	Hand	Daily	When broken		No	No	No	No			No	Never	No	0									12	3
175	Kanke	Kanke	Male	36	Illiterate	25	2	Outdoor		Yes	Extensive	Large herds	50	River/Stream	Yes	No	Others	Family member	No	No	No	No	No	No	No	Hand	Daily	When broken		No	No	No	No			No	Never	No	0									13	5
176	Kanke	Kanke	Male	29	Illiterate	14	2	Outdoor	Group	Yes	Extensive	Large herds	1	River/Stream	Yes	No	Others	Farmer	No	Only cows with dirty teats	No	No	No	No	No	Hand	Daily	When broken		No	No	No	No			No	Weekly	No	0									13	8
174	Kanke	Kanke	Male	50	Illiterate	40	2	Outdoor		Yes	Semi-intensive	Large herds	26	River/Stream	Yes	No	Others	Family member	No	No	No	No	No	No	No	Hand	Daily	When broken		No	No	No	No			No	Never	No	0				No			No		5	3
175	Kanke	Kanke	Male	52	Illiterate	42	1	Outdoor		Yes	Extensive	Large herds	45	River/Stream	Yes	No	Others	Family member	No	No	No	No	No	No	No	Hand	Daily	When broken		No	No	No	No			No	Weekly	No	1	Twice	Veterinarian	Visual	Yes		Farmer	Yes	Lack of medicine	7	2
176	Kanke	Kanke	Male	37	Illiterate	12	2	Outdoor	Group	Yes	Extensive	Large herds	150	River/Stream	No	No	Others	Family member	No	No	No	No	No	No	No	Hand	Daily	When broken		No	No	Yes	No			No	Weekly	No	1				Yes	Oxytet L.A	Farmer	Yes	Lack of animal health provider	20	10
176	Kanke	Kanke	Male	50	Illiterate	40	4	Outdoor		Yes	Extensive	Large herds	86	River/Stream	Yes	No	Others	Family member	No	No	No	No	No	No	No	Hand	Daily	When broken		No	No	No	No	Group		Yes	Never	No	1	Always		Visual	Yes		Farmer	Yes	Lack of medicine	20	9
177	Kanke	Kanke	Male	28	Illiterate	8	1	Outdoor	Group	Yes	Extensive	Large herds	65	River/Stream	Yes	No	Others	Family member	No	No	No	No	No	No	No	Hand	Daily	When broken		No	No	No	No		Only lactating	No	Weekly	No	0									15	4
178	Kanke	Kanke	Male	31	Primary school	20	1	Outdoor	Group	Yes	Extensive	Large herds	30	River/Stream	Yes	No	Others	Family member	No	No	No	No	No	No	No	Hand	Daily	When broken		No	No	No	No				Never	No	0									6	2
178	Kanke	Kanke	Male	40	Illiterate	30	3		Group	Yes	Extensive	Large herds	60	River/Stream	Yes	No	Others	Family member	No	Only cows with dirty teats	No	No	No	No	No	Hand	Monthly		No	No	No	Yes	No			No	Daily before milking	No	1		Veterinarian		Yes				Lack of animal health provider	20	9
179	Kanke	Kanke	Male	50	Illiterate	30	5	Outdoor	Group	Yes	Extensive	Large herds	45	River/Stream	Yes	No	Others	Family member	No	No	No	No	No	No	No	Hand	Daily	When broken		No	No	Yes	No			No	Weekly		0				No			No		10	1
180	Kanke	Kanke	Male	35	Primary school	20	4	Outdoor		Yes	Extensive	Large herds	150	River/Stream	Yes	No	Others	Family member	No	No	No	No	No	No	No	Hand	Daily	When broken		No	No	No	No			No	Never	No	0									40	14
181	Kanke	Kanke	Male	35	Illiterate	25	1	Outdoor	Group	Yes	Extensive	Large herds	62	River/Stream	Yes	No	Others	Family member	No	No	No	No	No	No	No	Hand	Daily	When broken		No	No	No	No			No	Weekly	No	1				No					20	10
180	Kanke	Kanke	Male	48	Illiterate	38	9	Outdoor	Group	Yes	Extensive	Large herds	150	River/Stream	No	No	Others	Family member	No	No	No	No	No	No	No	Machine	Daily	When broken		No	No	Yes	No			No	Never	No	0				No				Lack of medicine	20	4
181	Kanke	Kanke	Male	35	Illiterate	20	1	Outdoor	Group	Yes	Extensive	Large herds	55	River/Stream	Yes	No	Others	Family member	Yes	Only cows with dirty teats	No	No	No	No	No	Hand	Daily	When broken		No	No	Yes	No			No	Weekly	No	0									8	4
181	Kanke	Kanke	Male	52	Illiterate	40	4	Outdoor	Group	Yes	Extensive	Large herds	36	River/Stream	Yes	No	Others	Family member	No	No	No	No	No	No	No	Hand	Daily			No	Yes	No	No			No	Daily before milking	No	0				No					12	5
182	Kanke	Kanke	Male	48	Illiterate	28	1	Outdoor		Yes	Extensive	Large herds	40	River/Stream	Yes	No	Others	Family member	No	No	No	No	No	No	No	Hand	Daily	When broken		No	No	No	No		Only lactating	No	Weekly	No	0									7	1
183	Kanke	Kanke	Male	40	Illiterate	30	3	Outdoor	Group	Yes	Extensive	Large herds	45	River/Stream	Yes	No	Others	Family member	No	No	No	No	No	No	No	Hand	Daily			No	No	No	No			No	Weekly	No	0									10	4
182	Kanke	Kanke	Male	42	Primary school	32	2	Outdoor	Group	Yes	Extensive	Large herds	35	River/Stream	Yes	No	Others	Farmer	No	No	No	No	No	No	No	Hand	Monthly	When broken		No	No	Yes	No			No	Never	No	0				No					5	3
183	Kanke	Kanke	Male	30	Primary school	20	1	Indoor		Yes	Extensive	Large herds	21	River/Stream	Yes	No	Others	Family member	No	No	No	No	No	No	No	Hand	Daily	When broken		No	No	No	No			No	Weekly	No	0				No			No		8	1
184	Kanke	Kanke	Male	40	Illiterate	30	1	Outdoor		Yes	Extensive	Large herds	31	River/Stream	Yes	No	Others	Family member	No	No	No	No	No	No	No	Hand	Daily	When broken		No	No	Yes	No			No	Weekly	No	0									7	1
185	Kanke	Kanke	Male	48	Illiterate	38	4	Outdoor	Group	Yes	Extensive	Large herds	100	River/Stream	Yes	No	Others	Family member	No	No	No	No	No	No	No	Hand	Daily	When broken		No	No	No	No					No	0									15	15
184	Kanke	Kanke	Male	35	Illiterate	20	2	Outdoor	Group	Yes	Extensive	Large herds	45	River/Stream	No	No	Others	Family member	No	No	No	No	No	No	No	Hand		Monthly	Dried off cows		No	No	No			No	Never	No	0				No					8	10
185	Kanke	Kanke	Male	35	Primary school	25	2	Outdoor	Group	Yes	Extensive	Large herds	48	River/Stream		Yes	Blocks	Farmer	No	Only cows with dirty teats	No	No	No	No	No	Hand	Daily	When broken		No	No	No	No			No	Daily before milking	No	0				No					10	5
186	Kanke	Kanke	Male	38	Primary school	27	2	Outdoor	Group	Yes	Semi-intensive	Large herds	48	River/Stream	Yes	No	Others	Farmer	No	No	No	No	No	No	No	Hand	Daily	When broken		No	No	No	No			Yes	Weekly	No	0				No			No		7	2
187	Kanke	Kanke	Male	33	Illiterate	20	2	Outdoor	Group	Yes	Extensive	Large herds	52	River/Stream	Yes	No	Others	Farmer	No	No	No	No	No	No	No	Hand	Daily	When broken		No	No	Yes	No				Weekly	No	0									9	2
188	Kanke	Kanke	Male	35	Illiterate	20	1	Outdoor	Group	Yes	Extensive	Large herds	24	River/Stream	Yes	No	Others	Farmer	No	No	No	No	No	No	No	Hand	Daily	When broken		No	No	No	No			No	Daily before milking	No	0									8	2
189	Kanke	Kanke	Male	35	Illiterate	25	2	Outdoor	Group	Yes	Extensive	Large herds	57	River/Stream	Yes	No	Others	Farmer	No	No	No	No	No	No	No	Hand	Daily	When broken		No	No	No	No			No	Weekly	No	0									8	1
190	Kanke	Kanke	Male	52	Illiterate	40	1	Outdoor	Group	Yes	Extensive	Large herds	30	River/Stream	No		Others	Family member	Yes	Only cows with dirty teats	No	No	No	No	No	Hand	Daily	When broken		No	No	No	No			No	Weekly	No	0									7	1
16	Pankshin	Pankshin	Male	30	Primary school	1	3	Indoor	Group	Yes	Intensive	Large herds	50	Lake/Dam	No	No	Concentrate	Farmer	Yes	No	Yes	Yes	No	Yes	Yes	Hand	Daily	When broken	Selected cows	Yes	Yes	Yes	Yes	Group	Lactating & dry	Yes	Daily before milking	Yes	1	Twice	Farmer	Bacterial culture	Yes		Veterinarian	Yes	Lack of medicine	2	6
17	Pankshin	Pankshin	Male	27	Illiterate	1	1	Indoor	Group	Yes	Intensive	Large herds	40	Lake/Dam	Yes	Yes	Concentrate	Farmer	Yes	No	Yes	Yes	Yes	No	No	Hand	Daily	Annually	No	No	Yes	Yes	Yes	Group	Lactating & dry	Yes	Daily before milking	Yes	1	Always	Farmer	Bacterial culture	Yes		Veterinarian	Yes	Lack of medicine	10	4
18	Pankshin	Pankshin	Male	30	Primary school	1	1	Indoor	Group	Yes	Smallholder	Large herds	15	River/Stream	No	No	Concentrate	Farmer	No	No	No	No	Yes	Yes	Yes	Hand	Daily	When broken	No	Yes	Yes	Yes	Yes	Group	Only lactating	Yes	Daily before milking	No	1	Always	LEO	CMT	Yes		Veterinarian	Yes	Medicine not working	5	3
19	Pankshin	Pankshin	Male	22	Illiterate	1	1	Indoor	Group	Yes	Intensive	Large herds	30	Lake/Dam	No	No	Concentrate	Farmer	No	No	Yes	Yes	Yes	Yes	Yes	Hand	Daily	Annually	Dried off cows	Yes	Yes	Yes	Yes	Group	Only lactating	Yes	Daily before milking	Yes	0
20	Pankshin	Pankshin	Male	40	Primary school	1	1	Indoor		Yes	Smallholder	Large herds		Other	Yes	No	Others	Farmer	No	No	No	No	Yes	No	Yes	Hand	Daily	Annually	No	Yes	Yes		Yes	Group	Lactating & dry	No	Daily before milking	No	1	Always	LEO	CMT	Yes		Veterinarian	Yes	Medicine not working	7	2
21	Pankshin	Pankshin	Male	40	Primary school	1	1	Indoor	Group	Yes	Intensive	Large herds	35	Well/Borehole	No	No	Concentrate	Farmer	Yes	No	Yes	Yes	Yes	Yes	Yes	Hand	Daily	Annually	No	Yes	Yes	Yes	Yes	Group	Only lactating	Yes	Daily before milking	Yes	1	Always		Visual	Yes		Farmer	Yes	Lack of medicine	5	7
22	Pankshin	Pankshin	Male	35	Primary school	1	2	Indoor	Group	Yes	Smallholder	Large herds		Well/Borehole	Yes	Yes	Concentrate	Farmer	Yes	Only cows with dirty teats	Yes	Yes	Yes	Yes	Yes	Hand	Daily	When broken	No	Yes	Yes	Yes	Yes	Group	Only lactating	Yes	Daily before milking	Yes	1	Always	Farmer	Visual	Yes		Veterinarian	Yes	Lack of animal health provider	7	8
23	Pankshin	Pankshin	Male		Primary school	1	1	Indoor	Group	Yes	Smallholder	Large herds		Well/Borehole	Yes	Yes	Concentrate	Farmer	No	No	No	No	Yes	Yes	Yes	Hand	Daily	When broken	No	Yes	Yes	Yes	Yes	Group	Only lactating	Yes	Daily before milking	No	1	Always	LEO	CMT	Yes		Veterinarian	Yes	Medicine not working	20	4
25	Pankshin	Pankshin	Male	67	Primary school	1	1	Indoor	Group	Yes	Smallholder	Large herds		Other	No	No	Concentrate	Farmer	No	No	No	No	Yes	Yes	Yes	Hand	Daily	When broken	No	Yes	Yes	Yes	Yes	Group	Only lactating	Yes	Daily before milking	No	1	Always	LEO	CMT	Yes		Veterinarian	Yes	Medicine not working	14	14
26	Pankshin	Pankshin	Male		Primary school	1	1	Indoor	Group	Yes	Smallholder	Large herds		Lake/Dam	Yes	Yes	Concentrate	Farmer	No	No	No	No	Yes	Yes	Yes	Hand	Daily	When broken	No	No	No	Yes	Yes		Only lactating	Yes	Daily before milking	No	1	Always	LEO	CMT	No		Veterinarian	No	Medicine not working	5	6
27	Pankshin	Pankshin	Male	40	Illiterate	1	1	Indoor	Group	Yes	Intensive	Large herds	40	Lake/Dam	Yes	Yes	Concentrate	Farmer	Yes	Only cows with dirty teats	Yes	Yes	Yes	Yes	Yes	Hand	Daily	Annually	No	Yes	Yes	Yes	Yes	Group	Lactating & dry	Yes	Daily before milking	Yes	1	Always		Bacterial culture	Yes		Veterinarian	Yes	Lack of animal health provider	19	10
28	Pankshin	Pankshin	Male	26	Illiterate	1	2	Indoor	Group	Yes	Intensive	Large herds	54	Lake/Dam	Yes	Yes	Concentrate	Farmer	Yes	No	Yes	Yes	Yes	Yes	Yes	Hand	Daily	When broken	No	Yes	Yes	Yes	No	Group	Lactating & dry	Yes	Daily before milking	Yes	1	Always		Bacterial culture	Yes		Veterinarian	Yes	Lack of medicine	14	10
29	Pankshin	Pankshin	Male	58	High school	1	1	Indoor	Group	Yes	Intensive	Large herds	55	Lake/Dam	Yes	Yes	Concentrate	Farmer	Yes	No	Yes	Yes	Yes	Yes	No	Machine	Daily	When broken	No	Yes	Yes	Yes	No	Group	Lactating & dry	Yes	Daily before milking	Yes	1	Always		Visual	Yes		Veterinarian	Yes	Lack of medicine	13	9
30	Pankshin	Pankshin	Male	35	Illiterate	1	2	Indoor		Yes	Smallholder	Large herds	55	Lake/Dam	No	No	Concentrate	Farmer	Yes	Only cows with dirty teats	Yes	Yes	Yes	Yes	Yes		Daily										Daily before milking	Yes	1	Always	Veterinarian	Bacterial culture	Yes		Farmer	Yes	Lack of medicine	9	10
31	Pankshin	Pankshin	Male	50	Illiterate	1	1	Indoor		Yes	Intensive	Large herds	80	Lake/Dam	Yes	Yes	Concentrate	Farmer	Yes	No	Yes	Yes	Yes	Yes	Yes	Hand	Daily	Annually	Dried off cows	Yes	Yes	Yes	Yes	Group	Other	No	Daily before milking	Yes	1	Always	Farmer	Bacterial culture	Yes		Veterinarian	Yes		20	10
32	Pankshin	Pankshin	Male	32	Primary school	2	2	Indoor	Group	Yes	Intensive	Large herds	60	Lake/Dam	No	No	Concentrate	Farmer	Yes	No	Yes	Yes	Yes	Yes	Yes	Hand	Daily	When broken	No	Yes	Yes	Yes	Yes	Group	Only lactating	Yes	Daily before milking	Yes	1	Always		Bacterial culture	Yes		Veterinarian	Yes	Lack of medicine	32	10
33	Pankshin	Pankshin	Male	35	Primary school	1	1	Indoor	Group	Yes	Intensive	Large herds	45	Lake/Dam	Yes	No	Concentrate	Farmer	Yes	No	Yes	Yes	Yes	Yes	Yes	Hand	Daily	When broken	No	No	No	No	Yes	Group	Other	No	Daily before milking	Yes	1	Twice		Visual	Yes		Veterinarian	Yes	Lack of medicine	7	4
34	Pankshin	Pankshin	Male	41	Primary school	1	1	Indoor		Yes	Smallholder	Large herds		Well/Borehole	Yes	Yes	Concentrate	Farmer	Yes	No	Yes	No	Yes	Yes	Yes	Hand	Daily	When broken	No	No	No	Yes	Yes	Group	Only lactating	No	Daily before milking	No	1	Always	LEO	CMT	Yes		Veterinarian	Yes	Medicine not working	15	4
35	Pankshin	Pankshin	Male	40	Primary school	1	1	Indoor	Group	Yes	Intensive	Large herds	30	Well/Borehole	Yes	Yes	Concentrate	Farmer	Yes	Only cows with dirty teats	No	Yes	Yes	Yes	Yes	Hand	Daily	Annually	Selected cows	No	Yes	No	Yes	Group	Only dry	Yes	Daily before milking	Yes	1	Always		Visual	Yes		Veterinarian	Yes	Lack of medicine	6	4
36	Pankshin	Pankshin	Male	20	Illiterate	2	2	Indoor	Group	Yes		Large herds	30	Lake/Dam	No	No	Concentrate	Farmer	Yes	Only cows with dirty teats	Yes	No	Yes	Yes	Yes	Hand	Daily	Monthly	Selected cows	Yes	Yes	Yes		Group	Only lactating	No	Daily before milking	Yes	1	Always	Veterinarian	Bacterial culture	No	Oxytet L.A	Veterinarian	No	Lack of animal health provider	10	14
37	Pankshin	Pankshin	Male	40	Primary school	1	1	Indoor	Group	Yes	Smallholder	Large herds		Other	No	No	Concentrate	Farmer	No	No	No	No	Yes	Yes	Yes	Hand	Weekly	Monthly	No	Yes	Yes	Yes	Yes	Group	Only lactating	Yes	Daily before milking	No	1	Always	LEO	CMT	Yes		Veterinarian	Yes	Medicine not working	6	4
38	Pankshin	Pankshin	Male	28	Illiterate	1	1	Outdoor	Individual	Yes	Smallholder	Large herds		Well/Borehole	No	No	Concentrate	Farmer	No	Only cows with dirty teats		Yes	No	Yes	No	Hand	Daily	Annually	No	Yes	Yes	Yes	Yes	Group	Only lactating	No	Daily before milking	Yes	1	Twice	Farmer	Bacterial culture	No		Veterinarian	Yes	Lack of medicine	6	4
39	Pankshin	Pankshin	Male	30	Illiterate	1	1	Indoor	Group	Yes	Smallholder	Large herds		Other	No	No	Concentrate	Farmer	No	No	No	No	Yes	Yes	Yes	Hand	Daily	Annually	No	Yes	Yes	Yes		Group	Only lactating	Yes	Daily before milking	No	1	Always	Farmer	CMT	Yes		Veterinarian	Yes	Medicine expensive	5	2
40	Pankshin	Pankshin	Male	20	Illiterate	1	1	Indoor	Group	Yes	Intensive	Large herds	50	Well/Borehole	No	No	Concentrate	Farmer	Yes	No	Yes	Yes	Yes	Yes	Yes	Hand	Daily	Annually	No	No	No	Yes	Yes	Group	Lactating & dry	No	Daily before milking	Yes	1	Always		Bacterial culture	Yes		Veterinarian	Yes	Lack of medicine	9	2
41	Pankshin	Pankshin	Male	27	High school	1	2	Indoor	Group	Yes	Smallholder	Large herds		Lake/Dam	Yes	No	Others	Farmer	No	Only cows with dirty teats	Yes	Yes	Yes	Yes	Yes	Hand	Daily	When broken	No	Yes	Yes	Yes	No	Group	Lactating & dry	Yes	Daily before milking	No	1	Twice	LEO	Visual	No		Veterinarian	Yes	Medicine not working	6	6
42	Pankshin	Pankshin	Male		Primary school	4	3	Indoor	Group		Smallholder	Large herds		Lake/Dam	Yes	No	Concentrate	Farmer	No	No	Yes	No	Yes	Yes	Yes	Hand	Daily	Annually	Dried off cows	Yes	Yes	No	Yes	Group	Only lactating	Yes	Daily before milking	No	1	Twice	LEO	Visual	No	Oxytet L.A	Veterinarian	Yes	Medicine not working	6	6
43	Pankshin	Pankshin	Male	25	Illiterate	1	2	Indoor	Group	Yes	Extensive	Large herds		Lake/Dam	Yes	No	Others	Farmer	No	No	No	No	Yes	Yes	Yes	Hand	Weekly	Annually	Dried off cows	Yes	Yes	No	Yes	Group	Lactating & dry	Yes	Daily before milking	No	1	Twice	LEO	Visual	No		Veterinarian	Yes	Medicine not working	5	5
44	Pankshin	Pankshin	Male	42	Primary school	5	2	Indoor	Group	Yes	Smallholder	Large herds		Lake/Dam	Yes	No	Concentrate	Farmer	No	Only cows with dirty teats	No	No	Yes	Yes	Yes	Hand	Weekly	Annually	Dried off cows	Yes	Yes	No	Yes	Group	Only lactating	Yes	Daily before milking	No	1	Twice	LEO	CMT	No		Veterinarian	Yes	Medicine not working	13	10
46	Pankshin	Pankshin	Male	55	Primary school	1	1	Indoor	Group	Yes	Intensive	Large herds	30	Lake/Dam	Yes	Yes	Concentrate	Farmer	Yes	Only cows with dirty teats	Yes	Yes	Yes	Yes		Hand	Daily	When broken	No	No	Yes	Yes	Yes	Group	Only dry	Yes	Daily before milking	Yes	1	Twice		Bacterial culture	Yes		Veterinarian	Yes	Medicine expensive	6	4
47	Qua'an Pan	Qua'an Pan	Male	25	College/Diploma	8	1		Group	Yes	Extensive	Large herds	23	Other	No	No	Others	Family member	No	No		No	No	No	No	Hand	Daily	When broken	No	No	No	No	No			No	Never	No	1			Bacterial culture	No		Veterinarian		Medicine expensive	4	2
48	Kwang/Quaanpan	Qua'an Pan	Male	35		7	6	Outdoor	Group	Yes	Extensive	Large herds	58	Other	No	No	Others	Farmer	Yes	No	No	No	No	No	No	Hand	Daily	When broken	No	No	No	No	No	Group	Only lactating		Daily before milking	No	1	Always	Veterinarian	CMT	Yes	Oxytet L.A	Veterinarian	Yes	Medicine not working	5	3
49	Qua'an Pan	Qua'an Pan	Male	25	High school	15	2	Outdoor	Group	Yes	Extensive	Large herds	25	Other	No	No	Others	Farmer	No	No	No	No	No	No	No	Hand	Daily	When broken	No	No	No	No	No	Group	Lactating & dry		Never	No	1	Always	Veterinarian	CMT	Yes	Oxytet L.A	Veterinarian	Yes	Other	2	4
50	Qua'an Pan	Qua'an Pan	Male	22	Primary school	20	4	Outdoor	Group	Yes	Extensive	Large herds	35	Other	No	No	Others	Farmer	No	No	No	No	No	No	No	Hand	Daily	When broken	No	No	No	No	No	Group	Other	Yes	Never	No	1	More than thrice	Veterinarian	CMT	Yes	Oxytet L.A	Veterinarian	Yes	Other	3	3
51	Kwalla/Quaanapan	Qua'an Pan	Male	28		9	10	Outdoor	Group	Yes	Extensive	Large herds	25	River/Stream	No	No	Grazing	Farmer	No	No	No	No	No	No	No	Hand	Daily	When broken	No	No	Yes	Yes	No	Group	Only dry	Yes	Daily before milking	No	1	Always	Veterinarian	CMT	Yes	Tramadol	Farmer		Medicine not working	10	7
52	Kwandee/Quaanpan	Qua'an Pan	Male	50		10	7	Outdoor	Group	No	Extensive	Large herds	59	Other	Yes	No	Others	Farmer	Yes	No	No	No	No	No	No	Hand	Daily	When broken	No	No	No	No	No	Group	Other	No	Daily before milking	No	1	Always		Visual	Yes	Tramadol		Yes	Medicine not working	3	2
53	Kwandee/Quaanpan	Qua'an Pan	Male	35		8	13	Outdoor	Group	No	Extensive	Large herds	31	Other	No	No	Others	Farmer	No	No	No	No	No	No	No	Hand	Daily	When broken	Selected cows	No	No	No	No	Group	Lactating & dry	No	Daily before milking	No	1	Thrice	Veterinarian	CMT	Yes	Trydox	Veterinarian	Yes	Other	3	2
54	Doemak/Quaanpan	Qua'an Pan	Male	45		10	11	Outdoor	Group	Yes	Extensive	Large herds	39	Other	No	No	Others	Farmer	No	No		No	No	No	No	Hand	Daily	When broken	No	No	No	No	No	Group	Lactating & dry	No	Daily before milking	No	1	Always	Veterinarian	CMT	Yes	Trydox	Veterinarian	Yes	Other	10	15
55	Qua'an Pan	Qua'an Pan	Male	30	Illiterate	19	1	Outdoor	Group	Yes	Extensive	Large herds	40	Other	No	No	Others	Farmer	No	No	No	No	No	No	No	Hand	Daily	When broken	Dried off cows	No	No	No	No	Group	Only lactating		Daily before milking	No	1	Thrice	Veterinarian	Visual	Yes	Trydox	Veterinarian	Yes	Other	2	4
56	Doemak/Quaanpan	Qua'an Pan	Male	35		6	4	Outdoor	Group	Yes	Extensive	Large herds	15	Other	No	No	Others	Farmer	No	No	No	No	No	No	No	Hand	Daily	When broken	Dried off cows	No	No	No	No	Group	Other	Yes	Daily before milking	No	1	Always	Veterinarian	Visual	Yes	Tylosin	Veterinarian	Yes	Other	5	5
57	Doemak/Quaanpan	Qua'an Pan	Male	35		11	8	Outdoor	Group	No	Extensive	Large herds	48	Other	No	No	Others	Farmer	No	No	No	No	No	No	No	Hand	Daily	When broken	No	No	No	No	No	Group	Lactating & dry	No	Daily before milking	No	1	Always	Veterinarian	CMT	Yes	Tylosin	Veterinarian	Yes	Lack of animal health provider	16	4
58	Doemak/Quaanpan	Qua'an Pan	Male	28	College/Diploma	10	1	Outdoor	Group	Yes	Semi-intensive	Large herds	18	River/Stream	No	No	Grazing	Family member	No	No	No	No	No	No	No	Hand	Daily	When broken	Dried off cows	No	No	No	No		Other	No	Never	No	1	Twice	Farmer	Visual	Yes	Oxytet L.A	Farmer	No	Other	4	3
59	Qua'an Pan	Qua'an Pan	Male	31	Illiterate	10	2	Semiindoor	Group	Yes	Extensive	Large herds	21	Other	No	No	Others	Farmer	No	No	No	No	No	No	No	Hand	Daily	When broken	No	No	No	No	No	Group	Lactating & dry	No	Daily before milking	No	1	Always	Veterinarian	CMT	No		Veterinarian	No	Medicine not working	3	2
60	Doemak/Quaanpan	Qua'an Pan	Male	30	Illiterate	12	7	Outdoor		Yes	Extensive	Large herds	36	River/Stream	No	No	Others	Family member	No	No	No	No	No	No	No	Hand	Daily	When broken	No	No	No	No	No			No	Never	No	1	Twice	Veterinarian	Visual	Yes	Oxytet L.A		No	Lack of medicine	3	3
61	Doemak/Quaanpan	Qua'an Pan	Male	25	Primary school	14	8	Outdoor	Group	Yes	Extensive	Large herds	25	River/Stream	No	No	Others	Family member	No	No	No	No	No	No	No	Hand	Daily	When broken	No	No	No	No	No		Other	No	Never	No	1	Thrice	LEO	CMT	Yes	Oxytet L.A	Veterinarian	No	Medicine expensive	2	2
62	Bwall/Qua'an Pan	Qua'an Pan	Male	58	Illiterate	45	3	Outdoor	Group	Yes	Extensive	Large herds	100	River/Stream	No	No	Others	Family member	No	No	No	No	No	No	No	Hand	Daily	When broken	No	No	No	No	No			No	Never	No	1	Twice	Farmer	Visual	Yes	Oxytet L.A		No	Lack of medicine	10	9
63	Qua'an Pan	Qua'an Pan	Male	28	High school	5	3	Outdoor	Group	Yes	Extensive	Large herds	27	River/Stream	No	No	Others	Family member	No	No	No	No	No	No	No	Hand	Daily	When broken	No	No	No	No	No			No	Never	No	1			Bacterial culture	No		Veterinarian	No	Lack of medicine	2	2
64	Bwall/Tanba	Qua'an Pan	Male	18	Primary school	10	1	Outdoor	Group	Yes	Extensive	Large herds	27	River/Stream	No	No	Others	Family member	No	No	No	No	No	No	No	Hand	Daily	When broken	No	No	No	No	Yes	Group		No	Never	No	1			Bacterial culture	No		Veterinarian	No	Lack of medicine	5	3
65	Kwalla/Quaanapan	Qua'an Pan	Male	32	Illiterate	15	8	Outdoor	Group	Yes	Extensive	Large herds	41	River/Stream	No	No	Others	Family member	No	No	No	No	No	No	No	Hand	Daily	When broken	No	No	No	No	No			No	Never	No	1		Veterinarian	Visual	No			No	Lack of medicine	10	3
66	Qua'an Pan	Qua'an Pan	Male	30	Primary school	15	2	Outdoor	Group	Yes	Extensive	Large herds	46	River/Stream	No	No	Others	Family member	No	No	No	No	No	No	No	Hand	Daily	When broken	No	No	No	No	No			No	Never	No	0	Always		Bacterial culture	No		Veterinarian	No	Lack of medicine	5	4
67	Qua'an Pan	Qua'an Pan	Male	35	College/Diploma	15	2	Outdoor	Group	Yes	Extensive	Large herds	26	River/Stream	No	No	Others	Family member	No	No	No	No	No	No	No	Hand	Daily	When broken	No	No	No	No	No			No	Never	No	1			Bacterial culture	No		Veterinarian	No	Lack of medicine	5	6
68	Kwalla/Quaanapan	Qua'an Pan	Male	36	University	18	3	Outdoor	Group	Yes	Extensive	Large herds	40	River/Stream	No	No	Others	Family member	No	No	No	No	No	No	No	Hand	Daily	When broken	No	No	No	No	No			No	Never	No										4	5
69	Qua'an Pan	Qua'an Pan	Male	35	Illiterate	20	5	Outdoor	Group	Yes	Extensive	Large herds	29	River/Stream	No	No	Others	Family member	No	No	No	No	No	No	No	Hand	Daily	When broken	No	No	No	No	No	Group		No	Never	No	1		Veterinarian	Visual	Yes		Veterinarian	No	Lack of medicine	2	4
70	Doemak/Quaanpan	Qua'an Pan	Male	60	Primary school	21	11	Outdoor	Group	Yes	Extensive	Large herds	47	River/Stream	No	No	Others	Family member	No	No	No	No	No	No	No	Hand	Daily	When broken	No	No	No	No	No			No	Never	No	1			Bacterial culture	No		Veterinarian	No	Medicine expensive	10	8
71	Doemak/Quaanpan	Qua'an Pan	Male	45	College/Diploma	25	8	Outdoor	Group	Yes	Extensive	Large herds	30	River/Stream	No	No	Others	Family member	No	No	No	No	No	No	No	Hand	Daily	When broken	No	No	No	No	No			No	Never	No	0		Veterinarian	Bacterial culture	No		Veterinarian	No	Lack of medicine	6	10
72	Bwall/Qua'an Pan	Qua'an Pan	Male	40	Illiterate	35	2	Outdoor	Group	Yes	Extensive	Large herds	55	River/Stream	No	No	Others	Family member	No	No	No	No	No	No	No	Hand	Daily	When broken	No	No	No	No	No			No	Never	No	1			Bacterial culture	No		Veterinarian	No	Medicine expensive	8	5
73	Qua'an Pan	Qua'an Pan	Male	42	Illiterate	25	2	Semiindoor	Group	Yes	Semi-intensive	Large herds	35	River/Stream	No	No	Others	Family member	No	No	No	No	No	No	No	Hand	Daily	When broken	No	No	No	Yes	No	Group	Other		Daily before milking	No	1	More than thrice	Other	CMT	No		Farmer	No	Other	21	8
74	Kwalla/Quaanapan	Qua'an Pan	Male	30		5	8	Outdoor	Group	Yes	Extensive	Large herds	100	River/Stream	No	No	Grazing	Farmer	No	No	No	No	No	No	No	Hand	Daily	Monthly	Dried off cows	Yes	No	No	Yes	Group	Other	No	Daily before milking	No	1	Always	Veterinarian	Visual	Yes	Streptomycin	Farmer	Yes	Medicine not working	2	0
75	Kwalla/Quaanapan	Qua'an Pan	Male	20	Illiterate	5	7	Outdoor	Group	Yes	Extensive	Large herds	30	River/Stream		No	Others	Farmer	No	No	No	No	No	No	No	Hand	Daily	When broken	No	No	No	Yes	No	Group	Other	No	Never	No	1	More than thrice	LEO	Visual	Yes	Streptomycin	Farmer	Yes	Lack of animal health provider	3	2
76	Doemak/Quaanpan	Qua'an Pan	Male	30	Illiterate	5	10	Outdoor	Group	Yes	Extensive	Large herds	30	River/Stream	No	No	Others	Family member	No	No	No	No	No	No	No	Hand	Daily	When broken	No	No	No	No	No		Other	No	Never	No	1		Veterinarian		Yes	Gentamycin	Veterinarian	No	Lack of medicine	10	5
77	Doemak/Quaanpan	Qua'an Pan	Male	35	Primary school	15	12	Outdoor	Group	Yes	Extensive	Large herds	35	River/Stream	No	No	Others	Family member	No	No	No	No	No	No	No	Hand	Daily	When broken	No	No	No	No	No		Other	No	Weekly	No	1		Veterinarian	Visual	Yes	Gentamycin	Veterinarian	No	Medicine expensive	15	2
78	Shendam	Shendam	Male	27		11	1	Outdoor	Individual	Yes	Extensive	Large herds	30	River/Stream	Yes	No	Concentrate	Family member	No	No	No	No	No	No	No	Hand	Daily	When broken	No	No	No	No	Yes	Group	Lactating & dry	No	Daily before milking	No	1		Farmer	Visual	Yes	Procaine-penicilin	Farmer	Yes	Lack of medicine	5	3
79	Shendam	Shendam	Male	39		16	2	Outdoor	Individual	Yes	Extensive	Large herds	30	River/Stream	Yes	No	Concentrate	Family member	No	No	No	No	No	No	No	Hand	Daily	When broken	No	No	No	No	Yes	Group	Lactating & dry	No	Daily before milking	No	1		Farmer	Visual	Yes	Procaine-penicilin	Farmer	No	Lack of medicine	6	4
80	Shendam	Shendam	Male	32		20	2	Outdoor	Individual	Yes	Extensive	Large herds	29	River/Stream	Yes	No	Concentrate	Family member	No	No	No	No	No	No	No	Hand	Daily	When broken	No	No	No	No	Yes	Group	Lactating & dry	No	Daily before milking	No	0		Farmer		Yes	Procaine-penicilin	Farmer	Yes	Lack of medicine	3	1
81	Shendam	Shendam	Male	35	Illiterate	35	2	Outdoor	Individual	Yes	Extensive	Large herds		River/Stream	Yes	No	Concentrate	Family member	Yes	No	No	No	No	No	No	Hand	Daily	When broken	No	No	No	No	Yes	Group	Lactating & dry	No	Daily before milking	No	1		Farmer	Visual	Yes	Procaine-penicilin		Yes	Lack of medicine
82	Shendam	Shendam	Male	35	Illiterate	35	7	Outdoor	Individual	Yes	Extensive	Large herds		River/Stream	Yes	No	Concentrate	Family member	Yes	No	No	No	No	No	No	Hand	Daily	When broken	No	No	No	No	Yes	Group	Lactating & dry		Daily before milking	No	1		Farmer	Visual	Yes	Procaine-penicilin		Yes	Lack of medicine	15	9
83	Shendam	Shendam	Male	38	Illiterate	11	2	Outdoor	Individual	Yes	Extensive	Large herds	40	River/Stream	No	No	Concentrate	Family member	No	No	No	No	No	No	No	Hand	Daily	When broken	No	No	No	No	Yes	Group	Lactating & dry	No	Daily before milking	No	1		Farmer	Visual	Yes	Procaine-penicilin		No	Lack of medicine	6	5
84	Shendam	Shendam	Male	54		41	2	Outdoor	Individual	Yes	Extensive	Large herds	24	River/Stream	No	No	Concentrate	Family member	No	No	No	No	No	No	No	Hand	Daily	When broken	No	No	Yes	No	Yes	Group	Lactating & dry	No	Daily before milking	No	1		Farmer	Visual	Yes	Procaine-penicilin	Farmer	Yes	Lack of medicine	3	2
85	Shendam	Shendam	Male	27	Illiterate	27	1	Outdoor	Individual	Yes	Extensive	Large herds		River/Stream	No	No	Concentrate	Family member	No	No	No	No	No	No	No	Hand	Daily	When broken	No	No	No	Yes	No	Group	Lactating & dry	No		No	1		Farmer	Visual	Yes	Procaine-penicilin	Farmer	Yes	Lack of medicine	9	7
86	Shendam	Shendam	Male	29	Illiterate	15	1	Outdoor	Individual	Yes	Extensive	Large herds	34	River/Stream	Yes	No	Concentrate	Family member	No	No	No	No	No	No	No	Hand	Daily	When broken	No	No	No	No	Yes	Group	Lactating & dry	No		No	1		Farmer	Visual	Yes	Tylosin		Yes	Lack of medicine	7	2
87	Shendam	Shendam	Male	44		30	2	Outdoor	Individual	Yes	Extensive	Large herds	54	River/Stream	Yes	No	Concentrate	Family member	No	No	No	No	No	No	No	Hand	Daily	When broken	No	No	No	No	Yes	Group	Lactating & dry	No	Daily before milking	No	1		Farmer	Visual	Yes	Tylosin	Farmer	No	Lack of medicine	8	4
88	Shendam	Shendam	Male	40		31	4	Outdoor	Individual	Yes	Extensive	Large herds	51	River/Stream	Yes	No	Concentrate	Family member	No	No	No	No	No	No	No	Hand	Daily	When broken	No	No	No	No	Yes	Group	Lactating & dry	No	Daily before milking	No	1		Farmer	Visual	No	Tylosin	Farmer	Yes	Lack of medicine	9	5
89	Shendam	Shendam	Male	26		11	2	Outdoor	Individual	Yes	Extensive	Large herds	40	River/Stream	No	No	Concentrate	Family member	No	No	No	No	No	No	No	Hand	Daily	When broken	No	No	No	No	Yes	Group	Lactating & dry		Daily before milking	No	1		Farmer	Visual	Yes	Tylosin	Farmer	Yes	Lack of medicine	6	2
90	Shendam	Shendam	Male	30	Illiterate	13	2	Outdoor	Individual	Yes	Extensive	Large herds	42	River/Stream	No	No	Concentrate	Family member	No	No	No	No	No	No	No	Hand	Daily	When broken	No	No	No	No	Yes	Group	Lactating & dry	No	Daily before milking	No	1		Farmer	Visual	Yes	Tylosin	Farmer	Yes	Lack of medicine	7	0
91	Shendam	Shendam	Male	25	Illiterate	15	1	Outdoor	Individual	Yes	Extensive	Large herds	31	River/Stream	No	No	Concentrate	Family member	No	No	No	No	No	No	No	Hand	Daily	When broken	No	No	No	Yes	Yes	Group	Lactating & dry	No	Daily before milking	No	1		Farmer	Visual	Yes	Tylosin	Farmer	Yes	Lack of medicine	6	3
92	Shendam	Shendam	Male	39		19	3	Outdoor	Individual	Yes	Extensive	Large herds	54	River/Stream	No	No	Concentrate	Family member	No	No	No	No	No	No	No	Hand	Daily	When broken	No	No	No	No	No	Group	Lactating & dry	No	Daily before milking	No	1		Farmer	Visual	Yes	Tylosin	Farmer	Yes	Lack of medicine	8	3
93	Shendam	Shendam	Male	43	Illiterate	31	1	Outdoor	Individual	Yes	Extensive	Large herds	33	River/Stream	No	No	Concentrate	Family member	No	No	No	No	No	No	No	Hand	Daily	When broken	No	No	No	No	Yes	Group	Lactating & dry		Daily before milking	No	1		Farmer	Visual	Yes	Tylosin	Farmer	Yes	Lack of medicine	6	4
94	Shendam	Shendam	Male	42	Illiterate	24	4	Outdoor	Individual	Yes	Extensive	Large herds	87	River/Stream	Yes	No	Concentrate	Family member	No	No	No	No	No	No	No	Hand	Daily	When broken	No	No	No	No	Yes	Group	Lactating & dry	No	Daily before milking	No	1		Farmer	Visual	Yes	Oxytet L.A	Farmer	Yes	Lack of medicine	16	9
95	Shendam	Shendam	Male	49	Primary school	34	2	Outdoor	Individual	Yes	Extensive	Large herds	105	River/Stream	Yes	No	Concentrate	Family member	No	No	No	No	No	No	No	Hand	Daily	When broken	No	No	No	No	Yes	Group	Lactating & dry	No	Daily before milking	No	1		Farmer	Visual	Yes	Oxytet L.A	Farmer	Yes	Lack of medicine	22	11
96	Shendam	Shendam	Male	60		41	7	Outdoor	Individual	Yes	Extensive	Large herds	98	River/Stream	Yes	No	Concentrate	Family member	No	No	No	No	No	No	No	Hand	Daily	When broken	No	No	No	No	Yes	Group	Lactating & dry	No	Daily before milking	No	1		Farmer	Visual	Yes	Oxytet L.A	Farmer	Yes	Lack of medicine	19	8
97	Shendam	Shendam	Male	28		9	1	Outdoor	Individual	Yes	Extensive	Large herds	24	River/Stream	No	No	Concentrate	Family member	No	No	No	No	No	No	No	Hand	Daily	When broken	No	No	No	No	Yes	Group	Lactating & dry	No	Daily before milking	No	1		Farmer	Visual	Yes	Oxytet L.A	Farmer	No	Lack of medicine	6	3
98	Shendam	Shendam	Male	28		10	2	Outdoor	Individual	Yes	Extensive	Large herds	28	River/Stream	No	No	Concentrate	Family member	No	No	No	No	No	No	No	Hand	Daily	When broken	No	No	No	No	Yes	Group	Lactating & dry	No	Daily before milking	No	1		Farmer	Visual	Yes	Oxytet L.A	Farmer	No	Lack of medicine	7	2
99	Shendam	Shendam	Male	39	Illiterate	18	1	Outdoor	Individual	Yes	Extensive	Large herds	32	River/Stream	No	No	Concentrate	Family member	No	No	No	No	No	No	No	Hand	Daily	When broken	No	No	No	No	Yes	Group	Lactating & dry	No	Daily before milking	No	1		Farmer	Visual	Yes	Oxytet L.A	Farmer	Yes	Lack of medicine	3	3
100	Shendam	Shendam	Male	40	Illiterate	19	1	Outdoor	Individual	Yes	Extensive	Large herds	43	River/Stream	No	No	Concentrate	Family member	No	No	No	No	No	No	No	Hand	Daily	When broken	No	No	No	No	Yes	Group	Lactating & dry	No	Daily before milking	No	1		Farmer	Visual	Yes	Oxytet L.A	Farmer	Yes	Lack of medicine	12	5
101	Shendam	Shendam	Male	45		31	2	Outdoor	Individual	Yes	Extensive	Large herds	51	River/Stream	No	No	Concentrate	Family member	No	No	No	No	No	No	No	Hand	Daily	When broken	No	No	No	No	Yes	Group	Lactating & dry	No	Daily before milking	No	0		Farmer	Visual	Yes	Oxytet L.A		Yes	Lack of medicine	11	8
102	Shendam	Shendam	Male	38	Illiterate	38	2	Outdoor	Individual	Yes	Extensive	Large herds	32	River/Stream	No	No	Concentrate	Family member	No	No	No	No	No	No	No	Hand	Daily	When broken	No	No	No	No	Yes	Group	Lactating & dry	No	Daily before milking	No	1		Farmer	Visual	Yes	Oxytet L.A	Farmer	Yes	Lack of medicine	7	4
103	Shendam	Shendam	Male	40	Illiterate	40	2	Outdoor	Individual	Yes	Extensive	Large herds	38	River/Stream	No	No	Concentrate	Family member	No	No	No	No	No	No	No	Hand	Daily	When broken	No	No	No	Yes	Yes	Group	Lactating & dry	No	Daily before milking	No	1		Farmer	Visual	Yes	Oxytet L.A	Farmer	Yes	Lack of medicine	4	3
104	Shendam	Shendam	Male	39		17	2	Outdoor	Individual	Yes	Extensive	Large herds	31	River/Stream	No	No	Concentrate	Family member	No	No	No	No	No	No	No	Hand	Daily	When broken	No	No	No	No	Yes	Group	Lactating & dry	No	Daily before milking	No	1		Farmer	Visual	Yes	Oxytet L.A	Farmer	Yes	Lack of medicine	5	4
105	Shendam	Shendam	Male	42	Illiterate	28	3	Outdoor	Individual	Yes	Extensive	Large herds	38	River/Stream	No	No	Grazing	Family member	No	No	No	No	No	No	No	Hand	Daily	When broken	No	No	No	No	Yes	Group	Lactating & dry	No	Daily before milking	No	1		Farmer	Visual	Yes	Oxytet L.A	Farmer	Yes	Lack of medicine	8	7
106	Lamba/Wase	Wase	Male	30	College/Diploma	20	2	Outdoor	Individual	Yes	Smallholder	Large herds	40	Well/Borehole	Yes	No	Concentrate	Farmer	Yes	Only cows with dirty teats	No	No	No	No	No	Hand	Daily	When broken	No	No	Yes	No	No		Lactating & dry		Daily before milking	No	0									10	4
107	Lamba/Wase	Wase	Male	48	Primary school	20	2	Outdoor	Group	Yes	Smallholder	Large herds	17	Well/Borehole	Yes	No	Others	Family member	Yes	No	No	No	No	No	No	Hand	Daily	When broken	No	No	No	Yes	No		Lactating & dry	No	Daily before milking	No	0									6	0
108	Lamba/Wase	Wase	Male	29	University	10	1	Outdoor	Group	Yes	Smallholder	Large herds	68	Lake/Dam	No	No	Others	Family member	No	No	No	No	Yes	No	No	Hand	Daily	When broken	No	No	No	No	No		Lactating & dry	No	Never	No	1	Twice	Veterinarian	Visual	No			Yes	Lack of animal health provider	15	5
109	Lamba/Wase	Wase	Male	85	Illiterate	20	2	Outdoor	Individual	Yes	Smallholder	Large herds	20	Well/Borehole	No	Yes	Concentrate	Family member	Yes	No	No	No	No	No	No	Hand	Daily	When broken	No	No	Yes	Yes	Yes	Group	Lactating & dry	No	Daily before milking	No	0									3	1
110	Lamba/Wase	Wase	Male	60	Primary school	50	1	Outdoor	Individual	Yes	Smallholder	Large herds	40	Well/Borehole	Yes	Yes	Concentrate	Family member	No	Only cows with dirty teats	No	No	No	No	No	Hand	Daily	When broken	No	No	Yes	Yes	No		Lactating & dry		Daily before milking	No	0									7	8
111	Lamba/Wase	Wase	Male	45	Illiterate	30	3	Outdoor	Group	Yes	Smallholder	Large herds	142	River/Stream	Yes	Yes	Concentrate	Family member	No	Only cows with dirty teats	No	No	No	No	No	Hand	Daily	When broken	No	No	Yes	Yes	No		Lactating & dry	No	Daily before milking	No	0									30	10
112	Lamba/Wase	Wase	Male	30	Illiterate	15	1	Outdoor		Yes	Smallholder	Large herds	40	Lake/Dam	No	Yes	Concentrate	Family member	No	Only cows with dirty teats	No	No	No	No	No	Hand	Daily	Annually	No	No	Yes	Yes	Yes	Group	Lactating & dry	Yes	Daily before milking	No	0									10	5
113	Lamba/Wase	Wase	Male	34	Illiterate	20	1	Outdoor	Group	Yes	Smallholder	Large herds	30	Lake/Dam	No	Yes	Concentrate	Family member	No	Only cows with dirty teats	No	No	No	No	No	Hand	Daily	When broken	No	No	Yes	No	Yes	Group	Lactating & dry	No	Daily before milking	No	0									5	4
114	Lamba/Wase	Wase	Male	48	Primary school	30	4	Outdoor	Individual	Yes	Smallholder	Large herds	50	Lake/Dam	Yes	Yes	Concentrate	Family member	No	No	No	No	No	No	No	Hand	Daily	When broken	No	No	Yes	Yes	No				Daily before milking	No	0									13	2
115	Lamba/Wase	Wase	Male	50	Illiterate	35	4	Outdoor	Group	Yes	Smallholder	Large herds	40	Lake/Dam	Yes	Yes	Concentrate	Family member	No	No	No	No	No	No	No	Hand	Daily	When broken	No	No	Yes	Yes	No		Lactating & dry	No	Daily before milking	No	0									6	4
116	Lamba/Wase	Wase	Male	47	Primary school	18	6	Outdoor		Yes	Smallholder	Large herds	148	River/Stream	Yes	No	Others	Family member	No	No	No	No	No	No	No	Hand	Daily	When broken	No	No	Yes	Yes	No		Lactating & dry	Yes	Weekly	Yes	0									20	15
117	Lamba/Wase	Wase	Male	27	Primary school	7	2	Outdoor		Yes	Smallholder	Large herds	138	River/Stream	Yes	No	Others	Family member	No	Only cows with dirty teats	No	No	No	No	No	Hand	Daily	When broken	No	No	Yes	Yes	No		Lactating & dry	No	Never	No	0									20	5
118	Lamba/Wase	Wase	Male	47	Illiterate	10	4	Outdoor		Yes	Smallholder	Large herds	144	Well/Borehole	No	No	Others	Family member	No	No	No	No	No	No	No	Hand	Daily	When broken	No	No	Yes	Yes	No		Lactating & dry	No	Never	No	0									20	15
119	Lamba/Wase	Wase	Male	34	Illiterate	18	3	Outdoor	Group	Yes	Smallholder	Large herds	41	Well/Borehole	No	No	Others	Family member	No	No	No	No	No	No	No	Hand	Daily	When broken	No	No	Yes	Yes	No		Lactating & dry	No	Weekly	No	0									5	4
120	Lamba/Wase	Wase	Male	39	Illiterate	20	1	Outdoor	Group	Yes	Smallholder	Large herds	64	Well/Borehole	No	No	Others	Family member	No	No	No	No	No	No	No	Hand	Daily	When broken	No	No	Yes	Yes	No		Lactating & dry	No	Daily before milking	No	0									18	10
255	Lamba/Wase	Wase	Male	34	Illiterate	15	4	Outdoor	Individual	Yes	Smallholder	Large herds	36	Lake/Dam	No	No	Others	Family member	No	Only cows with dirty teats	No	No	No	No	No	Hand	Daily	When broken	No	No	Yes	Yes	No		Lactating & dry	No	Daily before milking	No	0									5	2
256	Lamba/Wase	Wase	Male	35	High school	12	2	Outdoor	Group	Yes	Smallholder	Large herds	45	Lake/Dam	No	No	Others	Family member	No	Only cows with dirty teats	No	No	No	No	No	Hand	Daily	When broken	No	No	Yes	Yes	No		Lactating & dry	No	Daily before milking	No	0									13	5
257	Lamba/Wase	Wase	Male	30	Illiterate	20	2	Outdoor	Group	Yes	Smallholder	Large herds	30	Lake/Dam	No	No	Others	Family member	No	Only cows with dirty teats	No	No	No	No	No	Hand	Daily	When broken	No	Yes	Yes	Yes	No		Lactating & dry	No	Daily before milking	No	0									5	6
258	Lamba/Wase	Wase	Male	45	Primary school	20	2	Outdoor	Group	Yes	Smallholder	Large herds	51	Lake/Dam	No	No	Others	Family member	Yes	Only cows with dirty teats	No	No	No	No	No	Hand	Daily	When broken	No	No	No	Yes	No		Lactating & dry	No	Never	Yes	0									10	10
259	Lamba/Wase	Wase	Male	36	Illiterate	22	3	Outdoor		Yes	Smallholder	Large herds	62	Lake/Dam	No	No	Others	Family member	No	Only cows with dirty teats	No	No	No	No	No	Hand	Daily	When broken	No	No	Yes	Yes	No		Lactating & dry	No	Never	No	0									13	6
260	Lamba/Wase	Wase	Male	40	Illiterate	25	2	Outdoor	Group	Yes	Smallholder	Large herds	74	Lake/Dam	No	No	Others	Family member	No	Only cows with dirty teats	No	No	No	No	No	Hand	Daily	When broken	No	No	Yes	Yes	No		Lactating & dry	No	Never	No	0									20	9
261	Lamba/Wase	Wase	Male	40	Primary school	25	2	Outdoor	Group	Yes	Smallholder	Large herds	50	Lake/Dam	No	No	Others	Family member	No	Only cows with dirty teats	No	No	No	No	No	Hand	Daily	When broken	No	No	Yes	Yes	No		Lactating & dry	No	Daily before milking	No	0									15	4
262	Lamba/Wase	Wase	Male	50	Illiterate	30	3	Outdoor		Yes	Smallholder	Large herds	62	Lake/Dam	No	No	Others	Family member	No	Only cows with dirty teats	No	No	No	No	No	Hand	Daily	When broken	No	No	Yes	Yes	No		Lactating & dry	No	Daily before milking	No	0									10	5
263	Lamba/Wase	Wase	Male	54	Illiterate	40	3	Outdoor	Group	Yes	Smallholder	Large herds	40	Lake/Dam	No	No	Others	Family member	No	Only cows with dirty teats	No	No	No	No	No	Hand	Daily	When broken	No	No	Yes	Yes	No		Lactating & dry	Yes	Daily before milking	No	0									5	5
264	Lamba/Wase	Wase	Male	45	Primary school	38	4	Outdoor	Group	Yes	Smallholder	Large herds	89	River/Stream	No	No	Others	Family member	No	Only cows with dirty teats	No	No	No	No	No	Hand	Daily	When broken	No	No	Yes	Yes	No		Lactating & dry	No	Never	No	0									25	10
265	Lamba/Wase	Wase	Male	44	Illiterate	20	2	Outdoor	Group	Yes	Smallholder	Large herds	54	Well/Borehole	No	No	Others	Family member	No	Only cows with dirty teats	No	No	No	No	No	Hand	Daily	When broken	No	No	Yes	Yes	No		Lactating & dry	No	Daily before milking	No	0									9	6
266	Lamba/Wase	Wase	Male	30	Illiterate	21	1	Outdoor	Group	Yes	Smallholder	Large herds	30	Well/Borehole	No	No	Others	Family member	No	Only cows with dirty teats	No	No	No	No	No	Hand	Daily	When broken	No	No	Yes	Yes	No		Lactating & dry	Yes	Daily before milking	No	0									4	5
267	Lamba/Wase	Wase	Male	52	College/Diploma	28	2	Outdoor	Group	Yes	Smallholder	Large herds	29	Well/Borehole	No	No	Others	Family member	No	Only cows with dirty teats	No	No	No	No	No	Hand	Daily	When broken	No	No	No	No	No		Lactating & dry	No	Never	No	0									5	4
126										Yes	Extensive	Large herds	30	River/Stream	Yes	No	Grazing	Family member	Yes	Only cows with dirty teats	Yes	No	No	No	No	Hand	Daily	When broken		No	No	Yes	No	Group	Lactating & dry	No	Daily before milking	No										7	15
132										Yes	Extensive	Large herds	20	River/Stream	Yes	No	Grazing	Family member	Yes	No	Yes	No	No	No	No	Hand	Daily	When broken	No	No	No	Yes	No	Group	Lactating & dry	No	Daily before milking	No	0			Bacterial culture	Yes		Veterinarian		Lack of animal health provider	11	7
254			Male	85	Illiterate	15	1	Outdoor	Group	Yes	Smallholder	Large herds	40	Lake/Dam	No		Others	Family member	No		No	No		No	No		Daily	When broken	No	No	Yes	Yes	No		Lactating & dry	No	Daily before milking	Yes	1	More than thrice	Farmer		Yes	Procaine-penicilin				10	8
123	Bassa	Bassa	Male	60	Primary school	25	3	Other	Group	Yes	Semi-intensive	Small herds	15	Lake/Dam	Yes	No	Concentrate	Family member	Yes	Only cows with dirty teats		Yes	No	No	Yes	Hand	Weekly	Monthly	Selected cows	No	No	No	Yes	Group	Lactating & dry	No	Daily before milking	No	0		Veterinarian		No			No		3	7
125	Bassa	Bassa	Male	40		20	0			Yes	Extensive	Small herds	15	River/Stream	Yes	No	Grazing	Family member	Yes	Only cows with dirty teats	Yes	No	No	No	No	Hand	Daily	When broken	No	No	No	Yes	No	Group	Lactating & dry	No	Daily before milking	No	0			Bacterial culture	Yes		Veterinarian		Lack of animal health provider	5	4
127	Bassa	Bassa	Male	45		20	0	Other		Yes	Extensive	Small herds	15	River/Stream	Yes	No	Concentrate	Family member	Yes	Only cows with dirty teats	Yes	No	No	No	No	Hand	Daily	When broken	No	No	No	Yes	No	Group	Lactating & dry	No	Daily before milking	No	1			Bacterial culture	Yes				Lack of animal health provider	10	5
137	Bassa	Bassa	Male	32	Primary school	20	0	Other	Group	Yes	Semi-intensive	Small herds	5	Lake/Dam	No	No	Concentrate	Family member	Yes	Only cows with dirty teats	Yes	No	Yes	Yes	Yes	Hand	Weekly	Monthly	Selected cows	No	No	No	Yes	Group	Only lactating	No	Daily before milking	No	0	Thrice			No			No		7	6
138	Bassa	Bassa	Male	41		15	0			Yes	Extensive	Small herds	10	River/Stream	Yes	No	Grazing	Family member	Yes	Only cows with dirty teats	Yes	No	No	No	No	Hand	Daily	When broken	No	No	No	Yes	No	Group	Lactating & dry	No	Daily before milking	No	0			Bacterial culture	Yes	Oxytet L.A	Veterinarian		Lack of animal health provider	5	4
139	Bassa	Bassa	Male	20	Primary school	10	0	Outdoor	Group	Yes	Semi-intensive	Small herds	6	Lake/Dam	No	No	Concentrate	Family member	Yes	Only cows with dirty teats	Yes	No	Yes	No	No	Hand	Daily	Monthly	Selected cows	No	No	No	Yes	Group	Only lactating	Yes	Daily before milking	Yes	0		Veterinarian	Visual	No			No	Medicine expensive	6	4
140	Federal Jos East	Jos East	Male	32	Primary school	21	1	Outdoor	Group	Yes	Extensive	Small herds	10	River/Stream	Yes	No	Grazing	Farmer	Yes	Only cows with dirty teats	No	No	No	No	No	Hand	Daily	When broken	No	No	No	No	No		None	No	Never	No	0		Farmer	Visual	No			No	None	4	0
141	Federal Jos East	Jos East	Male	37	Illiterate	29	1	Outdoor	Group	Yes	Extensive	Small herds	8	River/Stream	Yes	No	Grazing	Farmer	Yes	Only cows with dirty teats	No	No	No	No	No	Hand	Daily	When broken	No	No	No	No	No		None	No	When abnormal	No	0		Farmer	Visual	No			No	None	4	0
142	Federal Jos East	Jos East	Male	27	Illiterate	18	1	Outdoor	Group	Yes	Extensive	Small herds	8	River/Stream	Yes	No	Grazing	Farmer	Yes	Only cows with dirty teats	No	No	No	No	No	Hand	Daily	When broken	No	No	No	No	No		None	No	Never	No	0		Farmer	Visual	No			No	None	3	3
45	Pankshin	Pankshin	Male	30	Primary school	1	1	Indoor	Group	No	Intensive	Small herds		Pipeline	No	No	Concentrate	Farmer	No	No	No	No	Yes	Yes	Yes	Hand	Daily	Annually	No	Yes	Yes	Yes	Yes	Group	Lactating & dry	Yes	Daily before milking	No	1	Twice	LEO	CMT	Yes		Veterinarian	Yes	Lack of animal health provider	10	5
46	Lamba/Wase	Wase	Male	33	Illiterate	15	3	Outdoor	Individual	Yes	Smallholder	Small herds	11	Lake/Dam	Yes	No	Others	Family member	No	No	No	No	No	No	No	Hand	Daily	When broken	No	No	Yes	No	No				Daily before milking	No										3	0
47	Lamba/Wase	Wase	Male	28	Illiterate	20	1	Outdoor	Group	Yes	Smallholder	Small herds		Lake/Dam	Yes	Yes	Concentrate	Family member	No	Only cows with dirty teats	No	No	No	No	No	Hand	Daily	When broken	No	No	Yes	No	Yes	Group	Lactating & dry	No	Daily before milking	No	0									3	1
134								Other		Yes	Extensive	Small herds	15	River/Stream	Yes	No	Concentrate	Family member	Yes	Only cows with dirty teats	Yes	No	No	No	No	Hand	Daily	When broken	No	No	No	No	Yes	Group	Lactating & dry	No	Daily before milking	No										15	1
177	Kanke	Kanke	Male														Others	Family member	No	No	No	No	No	No	No	Hand	Daily	Annually		No	No	No	No			No	Never	No	0				No					9	2
24	Pankshin	Pankshin	Male		Primary school	1	1										Others	Family member	No	No	No	Yes	No	No	No		Daily	Annually	No	No	No	Yes	Yes	Group	Only lactating	Yes	Daily before milking	No	1	Twice	Veterinarian	Bacterial culture	Yes		Veterinarian	Yes	Medicine not working	6	3
25	Kwalla/Quaanapan	Qua'an Pan	Male	50	College/Diploma	40	7	Outdoor	Group	Yes	Extensive			River/Stream	No	No	Others	Family member	No	No	No	No	No	No	No	Hand	Daily	When broken	No	No	No	No	No			No	Never	No	1			Visual	No		Veterinarian		Medicine not working	10	5
26	Shendam	Shendam	Male	26	Illiterate	9	0	Outdoor	Individual	Yes	Extensive			River/Stream	Yes	No	Concentrate	Family member	No	No	No	No	No	No	No	Hand	Daily	When broken	No	No	No	No	Yes	Group	Lactating & dry	No	Daily before milking	No	1		Veterinarian	Visual	Yes	Procaine-penicilin		Yes	Lack of medicine	7	4
27	Shendam	Shendam	Male	34		15	1	Outdoor	Individual	Yes	Extensive			River/Stream	No	No	Concentrate	Family member	No	No	No	No	No	No	No	Hand	Daily	When broken	No	No	No	No	Yes	Group	Lactating & dry	No	Daily before milking	No	1		Farmer	Visual	No		Farmer	No	Lack of medicine	5	3
28	Shendam	Shendam	Male	52	Illiterate	40	1	Outdoor	Individual	Yes	Extensive			River/Stream	No	No	Concentrate	Family member	No	No	No	No	No	No	No	Hand	Daily	When broken	No	No	No	No	Yes	Group	Lactating & dry	No	Daily before milking	No	1		Veterinarian	Visual	Yes	Oxytet L.A	Farmer	No	Lack of medicine	3	2
29	Lamba/Wase	Wase	Male	42	Primary school	34	3	Outdoor	Group	Yes	Smallholder			River/Stream	No	No	Others	Family member	Yes	Only cows with dirty teats	No	No	No	No	No	Hand	Daily	When broken	No	No	Yes	Yes	No		Lactating & dry	No	Daily before milking	Yes	0									20	8
[truncated: 6 more columns]
