# Supplementary material for: Multilevel Risk Analysis of Clinical Mastitis in Dairy Cows in Plateau State, Nigeria: A Hierarchical Mixed-Effects Logistic Regression Modelling Approach
Source: Research Square preprint supplement (doi:10.21203/rs.3.rs-7142653/v1), 2025-08-12
Supplement: Supplementary file 2 [file daa6cb706dbe5d95eef3d2af.docx]

**Supplementary material 1**: The questionnaire

**Supplementary material 2:** Prevalence of mastitis among surveyed farms (n = 298)

| **Mastitis this year** | **Freq.** | **Percent** | **SE** | **95% CI** |
| --- | --- | --- | --- | --- |
| No | 121 | 40.6% | 0.028 | 0.351 - 0.463 |
| Yes | 177 | 59.4% | 0.028 | 0.537 - 0.649 |
| Total | 298 | 100.00% |  |  |

**Supplementary material 3. Criteria for inclusion of variable in the multivariable mixed-effects logistic regression present in Table 2 in the manuscript.**

Block 1: Although none of the variables reached statistical significance at the conventional 0.05 level, four were selected for inclusion in the multivariable mixed-effects logistic regression model based on pre-specified criteria (p < 0.25), theoretical relevance, and evidence of potential association.

The variable Number of employees was retained for further analysis because farms with more than 11 employees demonstrated an increased odds of mastitis (OR: 4.80), with a p-value of 0.15. Although not statistically significant, this variable was considered epidemiologically important; suggesting that labor structure may influence management practices and mastitis occurrence.

Years in dairy farming was also included (p = 0.163), as farmers with 31–45 years of experience showed moderately elevated odds of mastitis (OR: 1.87), potentially reflecting accumulated exposure to risk or differences in long-term management styles.

Education was retained based on its socio-demographic importance, despite a p-value of 0.208. Farmers with primary education showed a trend toward reduced odds of mastitis (OR: 0.50), which might suggest protective effects linked to basic literacy in dairy health practices.

Age group was included (p = 0.238) given its biological plausibility; those aged 50–59 years had a higher odds ratio (OR: 2.03) compared to younger groups, indicating that age may influence risk perception or the ability to implement effective control strategies.

Collectively, these variables were deemed essential for adjustment in the multivariable modeling to account for confounding and enhance the epidemiological robustness of the analysis, as shown in Table 2.

Block 2: Animal demographics and structure. Based on the results, six variables were identified as eligible for multivariable analysis, primarily using a liberal inclusion threshold of p < 0.25 and guided by biological plausibility.

The variable female calves under one year showed a suggestive protective effect, particularly in the "few (1–3)" category, with a p-value of 0.059. This was retained due to its proximity to significance and relevance in representing herd composition. Similarly, the number of heifers served but awaiting pregnancy confirmation demonstrated an increased risk trend, especially in the "moderate (4–6)" category (p = 0.069), justifying its inclusion.

The number of heifers over two years that never calved was also retained (p = 0.094), as the “high (11–20)” category was associated with higher odds of mastitis. The variable “milking cows”, though not statistically significant (p = 0.158), revealed an increasing trend in mastitis odds among farms with larger numbers (20–49), warranting inclusion for further exploration of herd size effects.

Pregnant milking cows were also retained in the model, as the absence of pregnancy ("none" category) appeared to have a protective association (p = 0.15), indicating a potential link with overall herd reproductive performance. In contrast, non-pregnant milking cows did not exhibit any notable trend or statistical association (p = 0.417) and were excluded from further modeling due to limited discriminatory power.

The variable “dry cows awaiting calving” was noted for consideration, even though its lowest p-value was 0.27, above the typical threshold. It may be retained in alternate models if theoretically important or for balancing herd structure assessments (Table 2).

Block 3: Housing and management practices. The inclusion decisions were based on statistical significance (p ≤ 0.25), biological plausibility, and relevance to mastitis risk dynamics. These decisions are summarized in Table 2.

The “production system” variable met the criteria for inclusion due to a significant association between intensive systems and lower odds of mastitis (OR = 0.155, p = 0.028), making it a key structural factor in mastitis management. Although the smallholder system was not statistically significant (p = 0.131), it showed a suggestive trend and was considered for potential inclusion due to its practical importance in the local context.

Herd size, categorized by both total cattle and total animals, demonstrated relevance to mastitis occurrence. Large cattle herds were associated with increased odds of mastitis (OR = 2.21, p = 0.058), while small herds based on total animals appeared protective (OR = 0.23, p = 0.142). Both were retained due to borderline significance and potential interaction effects in larger models.

The number of working bulls (particularly in the moderate range of 3–5) had a p-value of 0.118 and was therefore retained for multivariable modeling. This variable may act as a proxy for herd composition and farm labor structure. Categories with wider confidence intervals and non-significant trends, such as “very many” working bulls, were considered for exclusion if they did not improve model fit.

Variables like “housing design” (p = 0.163) and “animal movement for grazing” (p = 0.159) were also included due to plausible biological relevance, particularly as indicators of environmental hygiene and mobility-related stress, respectively. Though not statistically significant, their associations were in expected directions and justified their retention.

Cow accommodation and small herds (when assessed based on total cattle) were excluded due to high p-values and lack of epidemiological support (Table 2).

Block 4: Water and feed practices, based on univariable model results, variables were assessed for inclusion using a liberal p-value threshold (p < 0.25), along with biological plausibility and epidemiological relevance. The variable "Feed cows after milking?" showed a borderline statistically significant association (p = 0.083), indicating a potentially protective effect and warranting its inclusion in further modeling. This may reflect improved metabolic recovery or stress buffering after milking.

Similarly, "Type of feed" was retained (p = 0.141), particularly due to the observed trend suggesting that grazing-based diets may be associated with reduced mastitis risk – possibly through lower environmental contamination or better immune resilience.

The variable "Supplement to lactating cows?" had borderline p-values in multiple categories, with both the "none" (p = 0.136) and "other" (p = 0.194) groups showing potentially meaningful associations. Given its importance in nutritional management and its possible effect modification role, this variable was included for further analysis.

Conversely, "Water source", despite some large odds ratios, was excluded due to non-significance (p = 0.201) and imprecise estimates (wide confidence intervals), likely reflecting sparse data in some categories. "Individual or group feeding?", "Feed supplements?", and "Water ad libitum?" also showed no meaningful associations (p > 0.5) and were therefore excluded from multivariable modeling.

In summary, Table 2 supports the inclusion of three biologically relevant variables from the water and feed domain – feed timing, feed type, and lactation supplementation – in the final multivariable modeling strategy. These selections build on the statistical signals observed in Table 1d, ensuring that important aspects of nutritional and water-related management are adequately controlled for in the adjusted analysis (Table 2).

Block 5: The milking hygiene domain. Based on the selection criteria, several hygiene-related practices demonstrated significant or borderline associations with mastitis occurrence and were therefore retained for multivariable analysis. Notably, cleaning teats before milking – especially for cows with visibly dirty teats – was strongly associated with lower odds of mastitis (p = 0.011). Teat dipping or spraying both before and after milking also showed significant protective effects (p = 0.012 and p = 0.011, respectively), affirming their relevance as preventive interventions.

Additionally, the frequency of washing milking equipment (p = 0.086) and servicing schedule (p = 0.098) were considered for inclusion despite borderline p-values, given their practical importance in reducing environmental contamination. Although cleaning all teats before milking did not reach statistical significance, it was retained due to its preventive rationale (p = 0.080).

Other variables – such as milking method, handwashing or glove use, cloth-sharing for cleaning, pre-stripping, who performed milking, and teat drying – showed no significant associations and were excluded from the multivariable modeling based on both statistical criteria and limited biological justification. These findings, summarized in the Table 2, guided the refinement of the multivariable model for this block (Table 2).

Block 6: Mastitis management. Based on their performance in univariable mixed-effects logistic regression analysis, several variables demonstrated statistically significant or borderline associations with the outcome and were therefore retained for multivariable modeling.

Most notably, not treating mastitis was significantly associated with reduced odds of mastitis (p = 0.003), a counterintuitive finding that likely reflects reverse causation or underreporting. Similarly, no recurrence of mastitis treatment was significantly associated with lower odds of mastitis (p = 0.004), indicating that herds not experiencing repeated cases may have more effective control measures in place.

The absence of any challenge in mastitis treatment also showed a borderline protective effect (p = 0.049), suggesting that ease of access to treatment resources may influence mastitis prevalence.

In terms of management practices, keeping heifers and cows in the same calving paddock (p = 0.060) and reporting mastitis as a main reason for culling (p = 0.065) were both borderline significant and biologically plausible as risk indicators of poor mastitis control. Use of bacterial culture as a diagnostic method was nearly significant (p = 0.071), highlighting its potential relevance for accurate diagnosis and better disease management.

Other variables, such as frequency of mastitis episodes, use of herbal drugs, and perceived expense of treatment, were considered for inclusion despite not meeting the traditional p-value threshold, based on theoretical relevance and borderline significance.

Variables with weak or no evidence of association – such as dry cow therapy, frequency of udder health checks, recording of mastitis cases, drug type, and buying replacement heifers – were excluded due to their high p-values and limited interpretive value (Table 2).

Overall, Table 2 provides a structured rationale for including key mastitis management variables in the multivariable model, prioritizing both statistical significance and biological relevance.
